1 **Optogenetic Control of Programmable Genome Editing by Photoactivatable**  
2 **CRISPR/Cas9 Nanosystem in the Second Near-Infrared Window**

3 Xiaohong Chen<sup>1</sup>, Yuxuan Chen<sup>1</sup>, Huhu Xin<sup>1</sup>, Tao Wan<sup>1</sup>, Yuan Ping<sup>1</sup>

4  
5 <sup>1</sup>College of Pharmaceutical Sciences, Zhejiang University, Hangzhou 310058, China

6  
7 These authors contributed equally: Xiaohong Chen, Yuxuan Chen.

8 Corresponding and requests for materials should be addressed to Y.P. (email:  
9 pingy@zju.edu.cn)

51  
52  
53  
54  
55  
56  
57  
58  
59  
60  
61  
62  
63  
64  
65  
66  
67  
68  
69  
70  
71  
72

## Abstract

We herein report the first optogenetically activatable CRISPR/Cas9 nanosystem for programmable genome editing in the second near-infrared (NIR-II) optical window. The nanosystem is composed of a cationic polymer-coated gold nanorod (APC) and Cas9 plasmid driven by a heat-inducible promoter. APC not only serves as a carrier for intracellular plasmid delivery, but also can harvest external NIR-II photonic energy and convert into local heat to induce the gene expression of Cas9 endonuclease. Due to high transfection activity, APC shows strong ability to induce significant level of disruption in different genome loci upon optogenetic activation. Moreover, the precise control of genome editing activity can be simply programmed by finely tuning exposure time and irradiation times *in vitro* and *in vivo*, and also enables editing at multiple time points, thus proving the sensitivity and reversibility of such an editing modality. The NIR-II optical feature of APC enables therapeutic genome editing at the deep tissue of the tumor-bearing mice, by which tumor growth could be effectively inhibited as a proof-of-concept therapeutic example. Importantly, this modality of optogenetic genome editing can significantly minimize the off-target effect of CRISPR/Cas9 in the most potential off-target sites. The optogenetically activatable CRISPR/Cas9 nanosystem we have developed offers a useful tool to expand the current applications of CRISPR/Cas9, and also defines a programmable genome editing strategy towards unprecedented precision and spatiotemporal specificity.

## 73 Introduction

74 The RNA-guided clustered, regularly interspaced, short palindromic repeats (CRISPR)-  
75 associated nuclease protein 9 (Cas9) is originally an adaptive immune defense system,  
76 by which many bacteria exploit to protect themselves from invading genetic elements<sup>1</sup>. It  
77 has been recently harnessed as an efficient tool for genome editing in both single cells  
78 and the whole organism for a wide range of biomedical applications in biology, genetics,  
79 and medicine, etc<sup>2,3</sup>. In principle, the CRISPR/Cas9 is composed a single-guide RNA  
80 (sgRNA) for the identification of DNA targets and a Cas9 endonuclease that can bind  
81 and process the recognized DNA targets<sup>4</sup>. CRISPR/Cas9-based genome editing  
82 technology offers a powerful and reliable strategy for the targeted modifications of the  
83 genome, enabling the precise perturbation of virtually any genomic sequence in living  
84 cells<sup>2-6</sup>. Due to its genome-wide specificity and multiplexing capability, Cas9 and its  
85 variants have shown great potentials in the generation of loss-of-function animals<sup>7,8</sup>, the  
86 correction of genetic disorders<sup>9,10</sup>, functional genome screening<sup>11-15</sup>, and the treatment of  
87 infectious diseases<sup>16,17</sup>. Despite of these excitements, the lack of temporal and spatial  
88 precision during editing process has severely constrained the current CRISPR/Cas9  
89 systems from complicated and diverse genome-editing scenarios. Furthermore, off-target  
90 activity has now become a major concern when the CRISPR/Cas9 system is exploited  
91 for therapeutic purposes.

92 To improve the spatiotemporal specificity of Cas9-mediated genomic manipulation,  
93 recent efforts have been dedicated to the development of inducible CRISPR/Cas9  
94 architectures to enable the conditional control of Cas9 activity through either chemical<sup>18-  
95 22</sup> or optical<sup>23-26</sup> means. By precisely limiting the time of Cas9 function, the off-target  
96 activity is also expected to be controlled by minimizing the unwanted prolong Cas9  
97 activity<sup>19,26</sup>. Chemical methods mainly refer to the regulation of endonuclease activity of

98 Cas9 through small-molecule-triggered Cas9 binding and self-splicing inteins<sup>19-21</sup>.  
99 Although a few examples have been illustrated for the temporal control of Cas9 activity<sup>27-</sup>  
100 <sup>29</sup>, however, this strategy generally lacks spatial specificity and reversibility, making it  
101 difficult to be explored for in vivo studies. Furthermore, the commonly used small  
102 molecules for chemical activation, such as rapamycin<sup>22</sup> and doxycycline<sup>19,21</sup>, may  
103 induce potential cytotoxicity towards both edited and non-edited cells<sup>30</sup>. As opposed to  
104 the chemical strategies, optical regulation of Cas9 function is more favorable in terms its  
105 non-invasiveness, spatiotemporal specificity and reversibility. In the past few years,  
106 several different photoactivatable systems have been adopted for the optical regulation  
107 of CRISPR/Cas9-based genome editing and transcriptional activation<sup>31,32</sup>. For example,  
108 photoactivatable Cas9 consisting of two split, deactivated Cas9 (dCas9) fragments and  
109 photoinducible dimerization domains (Magnets) was engineered to enable optogenetic  
110 control of CRISPR-Cas9 activity in human cells<sup>26</sup>. Upon blue light irradiation, the split  
111 Cas9 was fused to Magnet domains to recover its genome editing activity, which could  
112 be simply switched off by extinguishing the irradiation. More recently, optogenetic anti-  
113 CRISPR variants comprising a powerful Cas9 inhibitor (hybrids of AcrIIA4) and a LOV2  
114 photosensor, were engineered for the photoregulation of CRISPR-Cas9 activity<sup>33</sup>. As the  
115 photoirradiation enabled the release of dCas9 from the optogenetic variant of AcrIIA4,  
116 the inhibited Cas9 activity could be rapidly recovered to enable genome and epigenome  
117 editing. Nevertheless, most optically controlled CRISPR/Cas9 systems rely on the  
118 photoactivation by blue light. This suggests these blue light-mediated activatable  
119 CRISPR/Cas9 systems are not only difficult for deep-tissue penetration through turbid  
120 human tissues, but also are potentially phototoxic in the realistic genome-editing  
121 applications. To address these issues, far-red light-mediated CRISPR-dCas9 device,  
122 which is built based on the bacterial photoactivatable cyclic diguanylate monophosphate  
123 (c-di-GMP) synthase BphS and the c-di-GMP-responsive hybrid transactivator, has been  
124 recently developed for the targeted epigenetic modulation both in vitro and in vivo<sup>34</sup>.  
125 Most recently, near-infrared upconversion-activated CRISPR-Cas9 nanoparticle system  
126 have been proposed for the optical control of therapeutic gene editing towards cancer  
127 treatment<sup>35</sup>. While above two studies revealed the infrared light is critical for the  
128 regulation of genome editing and epigenome editing in vivo, the precise CRISPR/Cas9  
129 genome editing in a programmable, reversible manner has not been demonstrated yet,  
130 not to mention those for in vivo applications. In addition, off-target activity induced by  
131 light-controlled editing modalities still remains elusive to date.

132 We herein report the first photoactivatable CRISPR-Cas9 nanosystem for the  
133 optogenetic control of genome editing at the second near-infrared (NIR-II) optical window  
134 (1000 to 1700 nm). As shown in Scheme 1, this CRISPR/Cas9 nanosystem is typically  
135 composed of the cationic polymer-coated gold nanorod (AR) and the Cas9 plasmid  
136 driven by a heat-inducible promoter, HSP70 (HSP-Cas9). Whereas the cationic polymer  
137 is able to carry and deliver the plasmid into the targeted cells, the gold nanorod serves a  
138 photothermal transducer to transform the harvested external light into the intracellular  
139 local heat. As such, APC not only acts as the delivery carrier for the plasmid delivery, but  
140 also serve as an intracellular photothermal converter to trigger the transcription of Cas9  
141 and sgRNA. By incorporating the expression vector with Cas9 gene cloned downstream  
142 of a heat-inducible HSP70 promoter, the elevated local temperature subsequently offers  
143 a cue to promote the gene expression of Cas9. Thus, Cas9 activity can be regulated by  
144 heat-induced gene expression and activated by photothermal signals. APC/plasmid is  
145 first internalized by the targeted cell through charge-mediated internalization, followed by  
146 the formation of endosomes. After the endosomal escape, whereas the plasmid released

147 from APC enters into nucleus, APC still retains in the cytoplasm. Once upon the light  
148 irradiation at 1064 nm, APC quickly generates localized heat in the intracellular  
149 microenvironment to induce the transformation of heat shock factor (HSF) from inactive  
150 monomers to active trimmers, which are capable of translocating into the nucleus. Then,  
151 the binding of intranuclear trimmers to heat shock element (HSE) of the HSP70 promoter  
152 results in the activation of transcription<sup>36</sup>. However, once the light irradiation is switched  
153 off, the decreased temperature releases the bound trimmer from HSE, triggering the re-  
154 transformation of trimmers back to monomers to inactivate the transcription process<sup>37</sup>.  
155 Thus, APC acts as an optogenetic switch to regulate Cas9 expression and activity with  
156 high spatiotemporal specificity. As NIR-II light shows a stronger tissue-penetration ability  
157 as compared with the first NIR (NIR-I) light (650-950 nm), the regulation of genome  
158 editing in vivo is also affordable by APC through the optogenetic control in the NIR-II  
159 optical window. As we found in our study, APC-mediated optogenetic activation and  
160 spatiotemporal control of gene expression are demonstrated to direct Cas9 activity in a  
161 precise and programmable manner, and significantly reduce off-target effects in the  
162 current study, thereby paving a safe way for in vivo therapeutic genome editing and the  
163 spatiotemporal control of CRISPR/Cas9 in vitro and in vivo.

## 164 Results

165 In our study, the classic cetyltrimethylammonium bromide (CTAB)-mediated synthesis  
166 approach was used for the preparation of gold nanorods<sup>38,39</sup>, and uniform ARs with an  
167 aspect ratio of 7.1 (length =  $106.4 \pm 14.1$  nm, width =  $15.2 \pm 3.3$  nm) were obtained (Fig.  
168 1a). Afterwards, biocompatible polystyrene sulfonate (PSS), which acted as an  
169 interconnecting layer, was then coated on the AR surface through the electrostatic force  
170 to form PSS-coated ARs. Subsequently,  $\beta$ -cyclodextrin-PEI (CP), a cationic polymer that  
171 has been well demonstrated for the efficient transfection of plasmids for both in vitro and  
172 in vivo<sup>40-42</sup>, was assembled on the top of the PSS layer. The layer-by-layer assembly  
173 process to prepare APC was verified by zeta potential analysis (Fig. 1b), where the final  
174 product APC showed a positive surface charge. AR displayed a strong, broad absorption  
175 in the NIR-II region, with an absorption peak at ca. 1070 nm (Fig. 1c). Noticeably, the  
176 assembly of polyelectrolytes on AR merely affected the wavelength of maximum  
177 absorption. Such a NIR-II optical feature is crucial for in vivo investigations. Upon  
178 continuous laser irradiation at 1064 nm for 5 min, the temperature of APC solution  
179 quickly increased and achieved the plateau of 42 °C under a power density at 0.33  
180 W/cm<sup>2</sup>, as recorded by the infrared thermal camera (Fig. 1d). The maximum temperature  
181 generated by APC could be further adjusted to 65 °C at a power density of 1.00 W/cm<sup>2</sup>.  
182 The repeated heating and cooling of 3 cycles resulted in similar temperature fluctuation  
183 (Supplementary Fig. 1), and laser irradiation merely changed the morphology of APC  
184 (Supplementary Fig. 2), thus demonstrating its superior photothermal stability. As the  
185 optimal temperature for the activation of the HSP70 promoter was approximately 42 °C<sup>43</sup>,  
186 we also explored the irradiation mode that could stabilize the temperature at this degree.  
187 By discontinuous irradiation, the temperature could be finely tuned to a narrow range  
188 from 39.0-42.0 °C (Supplementary Fig. 3). Given the temperature elevation would start  
189 from body temperature for in vivo activation, we explored the fine temperature control  
190 starting from 37 °C by discontinuous irradiation, and found this irradiation approach could  
191 likewise control the temperature in an ideal range (39.0-42.0 °C) by slightly adjusting the  
192 discontinuous irradiation time (Supplementary Fig. 4). We thus adopted this  
193 discontinuous irradiation mode to control the temperature for the subsequent  
194 experiments for the activation of CRISPR/Cas9 systems in vitro and in vivo. In the

195 meantime, high-angle annular dark field scanning transmission electron microscopy  
196 (HAADF-STEM) and energy dispersive X-ray spectroscopy (EDS) mapping were  
197 performed to verify the layer-by-layer (LBL) structure of APC/HSP-Cas9 (Fig. 1e). The  
198 distribution of S, N or P element well overlapped with the Au element. The LBL structure  
199 of APC/HSP-Cas9 complexes was also determined by X-ray photoelectron spectroscopy  
200 (XPS). In the survey spectra of APC/HSP-Cas9 complexes (Fig. 1f), the peak of S2p  
201 belonged to the PSS coating, and the peak of N1s was corresponded to the nitrogen  
202 atoms in the CP and plasmid DNA. Cl2p and NaKLL was attributed to the salts in the  
203 buffer. In N1s and S2p spectrum of AuNR-CTAB and AuNR-PSS, the peaks of 402 eV  
204 belonged to the quaternary amine of CTAB (Supplementary Fig. 5a), and the  
205 appearance of S2p peak proved the coating of PSS in AuNR-CTAB (Supplementary Fig.  
206 5b). After coating of CP, the peak A (401.9 eV) decreased, whereas peak B and peak C  
207 (400.2 eV, 398.4 eV) that were attributed to the CP clearly increased (Supplementary Fig.  
208 5c)<sup>44,45</sup>. When APC was complexed with plasmid DNA, the elimination of peak A was due  
209 to the shielding effect after DNA complexation with APC (Supplementary Fig. 5d). To  
210 demonstrate whether APC was able to encapsulate the plasmid encoding Cas9 and  
211 luciferase, gel electrophoresis assay was first carried out. APC could completely inhibit  
212 plasmid DNA migration at APC/plasmid weight ratio of 0.15, proving its excellent  
213 capability to condense and carry plasmid DNA for gene transfection (Fig. 1g).

214 In the current, we constructed the Cas9-encoding plasmid driven by a HSP70 promoter.  
215 The plasmid consists of a Cas9 gene driven by HSP70 promoter (Supplementary Table  
216 1), an EGFP reporter and a luciferase reporter downstream of Cas9, all of which are  
217 separated by self-cleaving peptides P2A, followed by a segment of independent sgRNA  
218 sequence driven by U6 promoter downstream of luciferase reporter. To mark Cas9  
219 expression, the two reporters EGFP and luciferase, which is also driven by HSP70  
220 promoter, can express with Cas9 simultaneously (Fig. 1h). Therefore, we first checked  
221 the GFP expression after the intracellular delivery of APC/HSP-Cas9 complexes. As  
222 shown in Fig. 1i, very weak fluorescence generated from green fluorescence protein  
223 (GFP) was observed in the 293T cells without laser treatment, implying the low  
224 background activity. In sharp contrast, strong green fluorescence was observed after the  
225 light irradiation on the cells. Flow cytometry analysis indicated that after APC-mediated  
226 transfection and photothermal activation, the percentage of GFP-positive cells reached  
227 more than 90% under the laser irradiation, which is much higher than that from the  
228 transfection supported by Lipofectamine 2000 (Lipo, commercially available transfection  
229 agent) or PEI (non-viral ‘gold standard’ transfection agent) at 42 °C (Fig. 1j and  
230 Supplementary Fig. 6). The high level of gene expression was further corroborated by  
231 luciferase reporter assay, where strong luciferase expression was detected when the  
232 transfection was mediated APC with laser irradiation (Supplementary Fig. 7). The  
233 incorporation of sgRNA cloned downstream in the plasmid merely affected the  
234 transfection activity of APC (Supplementary Fig. 8). In the meantime, Bio-TEM image  
235 indicated that APC was primarily located in the cytoplasm after the GFP expression (Fig.  
236 1k). These results suggested that APC could not only mediate efficient transfection, but  
237 also trigger HSP70-regulated gene expression upon photothermal activation. In the  
238 meantime, we found that the level of luciferase expression could be modulated by laser  
239 intensity (Supplementary Fig. 9) and irradiation time (Supplementary Fig. 10), implying  
240 the transgene expression level is precisely tunable. In order to elucidate the role of  
241 specific internalization pathways, different inhibitors were added to the cell culture  
242 medium before the transfection in 293T cells (Supplementary Fig. 11-12). It was evident  
243 that the addition of methyl- $\beta$ -cyclodextrin significantly reduced GFP expression,

244 suggesting the internalization of APC/pDNA complexes primarily follows the caveolae-  
245 dependent endocytosis. Additionally, the inhibition of transfection activity by bafilomycin  
246 A1 suggested the strong buffering capacity of APC, which is critical to facilitate the  
247 endosomal escape of the delivered plasmids. APC also showed high transfection activity  
248 towards different types of cell lines upon photothermal activation (Supplementary Fig.  
249 13), which paves the way for the optogenetic control for CRISPR/Cas9 genome editing  
250 activity for an array of biomedical purposes.

251 Based on the above optimized results, we subsequently investigated whether  
252 optogenetic control of CRISPR/Cas9 activity could be manipulated through efficient  
253 transfection and photothermal conversion by APC (Fig. 2a). First, we tested whether  
254 APC was capable of disrupt enhanced green fluorescence protein (EGFP) gene in 293T  
255 cells that stably expressed EGFP (Fig. 2b). Upon the intracellular delivery of APC/HSP-  
256 Cas9 targeting EGFP, the intensity of GFP in 293T-EGFP cells decreased significantly  
257 with the laser irradiation, suggesting the strong ability of APC to mediate the disruption of  
258 GFP gene. Nevertheless, the treatment with APC/HSP-Cas9-sgEGFP without laser  
259 irradiation had negligible knockout effects. To further validate the genome editing  
260 efficiency, we studied the intracellular delivery of HSP-Cas9 plasmid targeting different  
261 genome loci in the 293T cell line. Indels (insertion and deletion) detected by T7  
262 Endonuclease I (T7E1) digestion assays were carried out to evaluate the efficiency of  
263 genome editing at the targeted genome sites. After the transfection and the photothermal  
264 activation, the bands from the digestion products of T7E1 distinguishing indels in the  
265 double-stranded DNA, were clearly detected from the uncut bands at the genomic locus  
266 of adeno-associated virus integration site 1 (AAVS1). We noted that the editing efficiency  
267 is slightly dependent on the APC concentration, with the highest indel rate of 20.1% at  
268 the APC/plasmid weight ratio of 1:2. As expected, AAVS1 genome editing by Lipo and  
269 PEI resulted in the indel rate of 8.9% and 3.3%, respectively, both of which were lower  
270 than that of APC-mediated genome editing (Fig. 2c). Sanger sequencing confirmed  
271 indels at the targeted loci, including base deletion, insertion and substitution around the  
272 protospacer adjacent motif (PAM) (Fig. 2d, Supplementary Fig. 14). In the meantime, we  
273 further investigated whether the level of GFP expression is synchronized with the Cas9-  
274 mediated genome disruption. As expected, the level of GFP expression was well  
275 correlated with the indel rate, suggesting the level of GFP expression could well reflect  
276 and estimate the indel rate (Fig. 2e). Similarly, by screening different sequences of  
277 sgRNA (Supplementary Table 2, 3), the optimized genome editing at rhomboid family  
278 member 1 (*RHBDF1*) locus mediated by APC showed an indel rate of 14.8%, which is  
279 more efficient than that of Lipo (6.5%, Fig. 2f) and confirmed by Sanger sequencing  
280 (Supplementary Fig. 14). Furthermore, we examined whether the optogenetic control  
281 could likewise activate the multiplex genome editing. To this end, we delivered two  
282 plasmids, both of which encoded a single but different sgRNA construct targeting AAVS1  
283 and *Plk1* (polo-like kinase 1), respectively. Both genome loci showed evident degree of  
284 editing, with the indel rates of 28.8% (AAVS1) and 37.0% (*Plk1*) (Fig. 2g, h). Since APC  
285 can well absorb NIR-II light that can afford deep-tissue penetration, we covered the cell  
286 culture plate with the breast chicken tissue of different thickness and investigated  
287 whether the irradiation could still activate the genome editing in the transfected cells in  
288 the presence of tissue (Fig. 2i). Though the increase of the tissue thickness impaired the  
289 genome editing activity, the indel (6.6%) could be still detectable in the presence of 12  
290 mm of breast chicken tissue. This suggested that the increase in the tissue thickness  
291 slightly impaired the penetration ability of NIR-II light, thereby affecting the photothermal  
292 conversion efficiency as we have demonstrated (Supplementary Fig. 15). Furthermore,

293 the luciferase expression was temperature-dependent and became evident when the  
294 temperature reached 39 °C, reaching the highest at 42 °C (Supplementary Fig. 16). The  
295 above data suggest that the temperature window between 39 to 42 °C is optimal for  
296 optogenetic activation of Cas9 transcription. Interestingly, such optogenetic activation  
297 also works well for dCas9-mediated transcriptional activation of exogenous genes. For  
298 example, when three plasmids (HSP-dCas9-SPH, U6-sgRNA, and miniCMV-mCherry)  
299 were co-transfected in 293T cells, only very low basal fluorescence was observed before  
300 optogenetic activation, due to the weak ability of miniCMV to induce transcription. In  
301 sharp contrast, mCherry expression became very strong after the transcriptional  
302 activation of the heat-shock promoter, suggesting its potential towards heat-inducible  
303 transcriptional activation (Fig. 2j). In the meantime, we investigated whether such a heat-  
304 shock approach affected cell cycles and induced potential apoptosis (Supplementary Fig.  
305 17). As expected, cells treated with APC/HSP-Cas9 complexes with or without laser  
306 irradiation showed similar cell-cycle pattern as those treated with PBS. In the meantime,  
307 cell transfected with APC/HSP-Cas9 complexes merely induce any apoptosis,  
308 suggesting the biocompatibility of APC and the safety of heat-shock optogenetic modality.  
309 Collectively, these results strongly suggested that the control of genome editing activity  
310 could be manipulated through optogenetic activation of CRISPR/Cas9.

311 While successfully establishing above strong evidence of optogenetic genome editing,  
312 we are curious about whether such a modality could precisely control the degree of  
313 editing. We first monitored the continuous bioluminescence (BL) intensity to reflect the  
314 amount of Cas9 expression upon the optogenetic activation, and incremental percentage  
315 of BL was studied as a function of time. As reflected by Fig. 3a, after the transfection for  
316 24 h, the BL intensity increased quickly once the laser was switched on, and reached the  
317 plateau after the laser irradiation for only 5 min, suggesting a fast and enhanced gene  
318 expression by optogenetic activation. However, the level of luciferase expression  
319 dropped slightly after this time point, and significantly decreased to the basal level upon  
320 the removal of irradiation. However, when the laser switched on again 24 h after the first  
321 irradiation, BL intensity rapidly increased again, and decreased upon the removal of  
322 irradiation. The above information suggested photothermal control of gene expression by  
323 APC is reversible, and APC may serve as an optogenetic switch to regulate Cas9  
324 expression and activity. These findings further stimulated us to explore how the level of  
325 genome editing could be precisely controlled through this optogenetic switch we have  
326 developed. By controlling the time length of irradiation from 5 to 30 min, we found the  
327 indel range could be precisely tuned from 3.4% to 31.4% (Fig. 3b, c), which was also  
328 reflected by GFP expression with different irradiation time (Supplementary Fig. 18).  
329 Furthermore, the temporal control of genome editing activity could also be simply  
330 realized by adjusting the number of irradiation times (Fig. 3d). When the irradiation was  
331 conducted for only one time (30 min), the resulted indel rate was 11.5%; however, the  
332 indel rate could be improved simply by increasing the number of irradiation times to  
333 reach the expected ones (Fig. 3e, f). It is worthy to mention that such a stepwise,  
334 optogenetic activation modality is also highly stable. By analyzing the indel rate at  
335 different time points, we found the degree of editing was generally stable over a period of  
336 36 h, irrespective of the irradiation times (Fig. 3g-j).

337 To validate the potential of such an optogenetic control modality in vivo, A549 cells  
338 transfected with APC/HSP-Cas9 complexes were subcutaneously transplanted into the  
339 back of the BALB/c mice ex vivo. The treated mice were monitored by a thermal camera  
340 to ensure that the temperature in the irradiation position remain stable. Following the

341 laser irradiation on the subcutaneous transfected cells, BL intensity gradually became  
342 strong along the increased irradiation time, suggesting the successful optogenetic  
343 activation of gene expression in a heat-inducible, finely tuned manner (Fig. 4a). We next  
344 harvested these transplanted cells and checked whether the optogenetic activation  
345 works for in vivo genome editing. As shown from T7E1 assay results (Fig. 4b, c), indel  
346 rate ranging from 4.7% to 20.1% could also be well manipulated by tuning the irradiation  
347 time, implying the controllable activation of Cas9 expression and programmable  
348 regulation of genome editing activity in vivo. Moreover, we explored whether direct in  
349 vivo transfection and optogenetic activation is possible. To this end, APC/HSP-Cas9  
350 complexes were first delivered into the hind limb of BALB/c mice via intramuscular  
351 injection (IM), and the optogenetic activation was conducted after 8 h (Fig. 4d). Strikingly,  
352 strong in vivo bioluminescence was clearly detected in the hind limb 40 h after the  
353 optogenetic activation. Based on these findings, we further harvested and lysed the  
354 tissue from the muscle of the hind limb to evaluate the indel mutation of the edited cells.  
355 The indel rate reached 18.1% with the laser irradiation, however, without laser irradiation,  
356 the indel was hardly detectable after the in vivo transfection of APC/HSP-Cas9  
357 complexes (Fig. 4e, f). This further motivated us to explore whether optogenetic genome  
358 editing could be manipulated in the deep tissue of local lesions, since NIR-II light have  
359 deeper penetration capability over the NIR-I light. For this purpose, BALB/c nude mice  
360 bearing A549 xenograft tumor were first injected with APC/HSP-Cas9 complexes  
361 through peritumoral injection, and the irradiation was then carried out in the presence of  
362 a piece of breast chicken tissue (5 mm of thickness) covering the tumor position to  
363 simulate the deep-tissue condition (Fig. 4g). Excitingly, strong BL intensity was clearly  
364 observed over the tumor tissue (Fig. 4g). The tumor temperature was detected as 40.0 to  
365 41.4 °C, suggesting that moderate hyperthermia could well activate the gene expression  
366 (Fig. 4g). In the meantime, significant level of genome editing was detected from both  
367 surface and deep layer of the tumor tissues, with an indel rate of 16.0% and 14.9%,  
368 respectively (Fig. 4h, i). These results strongly implied that such an optogenetic control  
369 may be suitable for regulating genome editing activity in deep-tissue environment. Given  
370 that the elevated temperature improved the Cas9 activity<sup>46</sup>, such a heat-shock approach  
371 may also improve the editing capacity of the optogenetically activatable nanosystem.  
372 Furthermore, the spatiotemporal specificity could be well manipulated as well through the  
373 optogenetic regulation. The systemic administration of APC/HSP-Cas9 of BALB/c mice  
374 by tail-vein injection resulted in strong luciferase expression in the liver that is exposed to  
375 irradiation (Fig. 4j, Supplementary Fig. 19). In agreement with the results from  
376 transcriptional activation of exogenous gene in vitro, the transcriptional activation of  
377 mCherry expression was also verified in vivo, when APC/plasmids complexes were co-  
378 delivered into the hind limb either through ex vivo transfection or direct in vivo tissue  
379 transfection, followed by optogenetic activation (Fig. 4k, l, Supplementary Fig. 20).  
380 Importantly, we demonstrated that the optogenetic activation through different  
381 administration approaches, including ex vivo transfection, direct in vivo intramuscular  
382 administration, and systemic administration, merely induced toxicity in the major organs  
383 (heart, liver, spleen, lung, and kidney) after the irradiation (Supplementary Figs. 21-23).  
384 The above results demonstrated that the spatiotemporal and programmable genome  
385 editing could also be safely achievable in vivo as well.

386 As a proof-of-concept example for therapeutic genome editing, we further investigated  
387 whether the optogenetic activation of CRISPR/Cas9 nanosystem is possible for cancer  
388 therapy. To this end, we first delivered Cas9 plasmid with sgRNA targeting *Plk1*, a  
389 master regulator of mitosis<sup>47</sup>, and activated the expression after the transfection in A549



390 cells. Indel analysis indicated that significant mutation was detected in the targeted  
391 genome locus, with an indel rate up to 41.5% when the optimized sgRNA targeting *Plk1*  
392 was used. (Fig. 5a). The editing-induced indel was also confirmed by Sanger sequencing  
393 results, where significant deletion and insertion was detected at the targeted loci around  
394 the PAM (Fig. 5b, Supplementary Fig. 14). Western blot analysis indicated that the level  
395 of *Plk1* expression remarkably reduced after the transfection and activation process (Fig.  
396 5c). These results in vitro well establish the fact that optogenetically regulated genome  
397 editing enables the efficient knockout of target *Plk1* gene. We next investigated whether  
398 the tumor growth could be effectively inhibited on BALB/c nude mice bearing A549  
399 xenograft tumor by this therapeutic modality (Fig. 5d). After the peritumoral injection of  
400 APC/HSP-Cas9 complexes, 48 h, we noticed that the BL was still visible, but became  
401 weak after irradiation activation (Fig. 5e). In the meantime, T7E1 assay results  
402 suggested the significant genome disruption in *Plk1* site in the tumor tissue (Fig. 5f, g).  
403 Thereby, the reduced expression was probably attributed to the presence of large  
404 amounts of apoptotic cells induced by *Plk1* disruption, leading to the poor ability to  
405 express luciferase. In fact, the above speculation is verified by the in vivo tumor inhibition  
406 assay, where the tumor-bearing mice injected with APC/HSP-Cas9 targeting *Plk1* exhibited  
407 significant tumor regression after the irradiation treatment. The tumor size also became  
408 much smaller in comparison with the initial size before treatment. In sharp contrast, the  
409 mice treated with the same formulation, but without laser treatment exhibited rapid tumor  
410 progression, reaching a final tumor volume of 1270 mm<sup>3</sup> at the 21 day (Fig. 5h, i). As an  
411 indicator of systemic toxicity, we monitored the body weight through therapy session,  
412 and noticed that a slight increase in body weight was observed at the end of the  
413 treatment (Fig. 5j). In the meantime, the toxicity to major organs was investigated by  
414 H&E staining (Supplementary Fig. 24), and blood biochemistry was also evaluated to  
415 reflect liver and kidney index (Supplementary Fig. 25). As compared with saline control  
416 group (without laser treatment), the tumor slice showed fewest tumor cells combined  
417 significant degree of necrosis. Whereas H&E staining suggested that such a therapeutic  
418 modality was generally safe and biocompatible in the major organs, the function index of  
419 blood biochemistry further validated that such an optogenetic treatment merely caused  
420 any damage to the liver and the kidney. These results collectively demonstrated such an  
421 optogenetic activatable CRISPR/Cas9 nanosystem provides a new strategy for  
422 programmable genome editing with unrivaled spatiotemporal specificity in vivo.

423 To analyze the off-target effects generated by this editing modality, we used an off-  
424 target searching tool, Cas-OFFinder to estimate the potential off-target sites and carried  
425 out T7E1 assay to evaluate whether gene mutations could be detected in the estimated  
426 off-target sites. Sanger sequencing analysis proved that the sequence that was  
427 suspected to off-target disruption displayed the same intact sequence as the wild-type  
428 one without any treatments (Supplementary Fig. 26), suggesting the high on-target  
429 activity with minimum off-target effect. These results collectively demonstrated that  
430 optogenetically activatable CRISPR/Cas9 nanosystem may minimize off-target effects  
431 through optogenetic control of Cas9 expression to reduce prolonged Cas9 activity.

## 432 Discussion

433 Remote activation with non-invasive NIR light has been extensively exploited in wide  
434 range of biomedical applications, such as microRNA detection<sup>48</sup>, brain stimulation<sup>49</sup>,  
435 modulation of gene expression<sup>43</sup>, and immunomodulation<sup>50</sup>, largely owing to the low  
436 photocytotoxicity and deep-tissue penetration capability of NIR light. To date, reports on

437 the optical control of CRISPR/Cas9 function with infrared light are very rare, not to  
438 mention those in NIR-II window. The recent advances in NIR-II-absorbing photothermal  
439 nanomaterials provide new possibilities to convert photonic energy into heat in the  
440 localized position at the NIR-II window. In comparison with the NIR-I light, NIR-II light has  
441 been validated to afford deeper tissue penetration, a key challenge preventing many  
442 optogenetic control strategies from in vivo investigations. Although a few types of  
443 organic<sup>51-53</sup> and inorganic nanomaterials<sup>39,53</sup> that absorb NIR-II light have been  
444 developed, AR was selected as a building block for APC largely due to its high  
445 photothermal conversion rate and photothermal stability<sup>54</sup>. Furthermore, the AR not only  
446 converts the external photonic energy into the intracellular local heat, but also serves as  
447 a template where the cationic polymers are assembled for the subsequent encapsulation  
448 of large plasmids. As an unconventional finding, the assembly of PC over AR surprisingly  
449 resulted in far more efficient condensation of Cas9 plasmid in comparison with PC  
450 alone<sup>42</sup>, probably owing to the higher aspect ratio of gold nanostructure more favorable  
451 for entangling the plasmid. This feature of AR may also facilitate APC to enter nucleus by  
452 passive fusion, as high-aspect-ratio nanoparticles, such as nanorods and nanoworms,  
453 were previously demonstrated to be superior to the spherical ones with identical surface  
454 chemistries in terms of nuclear entry<sup>55</sup>. It is also noteworthy that the incorporation of  
455 Cas9 plasmid and photothermal transducer into the same carrier ensures the delivery of  
456 two payloads into the same cell population, thereby maximizing the sensitivity and  
457 efficiency of optogenetic activation of the Cas9 transcription.

458 Heat-induced transcription of genes encoding a major heat-shock protein (HSP70) is a  
459 cytoprotective mechanism by which a wide variety of cells exploit to protect themselves  
460 from heat shock and other deleterious stresses<sup>56</sup>. HSP70 promoters are regulated by  
461 cytosolic HSF, which becomes active in response to moderate hyperthermia (39 °C to  
462 42 °C) to induce the expression of downstream heat-shock proteins that are critical for  
463 cellular defense<sup>57</sup>. The heat-responsive HSP70 promoters have been previously  
464 explored for the spatial and temporal control of gene expression through photothermal  
465 effects<sup>58-60</sup>. In the current study, we constructed the Cas9-encoding plasmid driven by a  
466 HSP70 promoter, which indeed serves as a photothermal switch to regulate the Cas9  
467 transcription by sensing the surrounding temperature. Such a design strategy for heat-  
468 inducible transcription is also affordable for dCas9-mediated transcription activation, and  
469 is expected to extend for a wide range of CRISPR/Cas-based potential applications. As  
470 the temperature could be finely tuned by controlling the irradiation time length and is  
471 closely correlated to Cas9 expression and activity, we are therefore capable of  
472 programming the degree of editing simply by adjusting exposure time and irradiation  
473 times. Hence, this editing modality may be applicable to the context where  
474 CRISPR/Cas9 activity is required to fulfill editing missions at multiple time points. For  
475 example, the optogenetically activatable CRISPR/Cas9 nanosystem may serve as an  
476 ideal platform for inducible editing at multiple time points that is required for  
477 CRISPR/Cas9 barcode editing to trace lineage information of different cells during  
478 development and diseases<sup>61</sup>. For many other applications, CRISPR/Cas9 activity should  
479 be inhibited following the on-target editing, and prolonged activity may otherwise cause  
480 undesired side effects. For instance, restriction of Cas9 activity to a narrow temporal  
481 window is critical in germline editing, as the persistent Cas9 activity following the initial  
482 rounds of mitosis contributes to mosaicism<sup>62,63</sup>. Collectively, our system also provides a  
483 robust method to diminish Cas9 activity after certain editing events simply by switching  
484 off the light.

485 Spatiotemporal specificity of CRISPR/Cas9 is essential for many potential therapeutic  
486 purposes in that Cas9 activity in ancillary tissues may give rise to safety risks. As a  
487 proof-of-concept study, we demonstrated that the spatiotemporal control of  
488 CRISPR/Cas9 activity can well be manipulated through optogenetic activation. Thanks to  
489 the NIR-II-absorbing feature of APC, the spatial optogenetic control is validated to be  
490 realizable in deep tissue, which opens an avenue for broader in vivo investigations. In  
491 addition, the current findings also suggest that precise control of Cas9 activity by light is  
492 important to diminish off-target effect and other genotoxicities<sup>64</sup>. Our future efforts will be  
493 dedicated to the intensive investigations of off-target effects at the whole-genome level,  
494 in order to understand the safe use of this genome-editing modality.

## 495 **Materials and Methods**

### 496 **Materials**

497 Sodium borohydride (NaBH<sub>4</sub>), silver nitrate (AgNO<sub>3</sub>), hydroquinone (HQ), Dulbecco's  
498 modified Eagle's medium (DMEM), polyethyleneimine (PEI, MW: 25k Da) and D-  
499 luciferin-K<sup>+</sup> salt bioluminescent substrate was purchased from Sigma-Aldrich (USA).  
500 Tetrachloroauric(III) acid trihydrate (HAuCl<sub>4</sub>·3H<sub>2</sub>O), cetyltrimethylammonium bromide  
501 (CTAB), poly(sodium 4-styrenesulfonate) (PSS, MW ~70,000 g/mol) were purchased  
502 from Aladdin (China). The cell counting kit-8 (CCK-8) was obtained from DOJINDO  
503 (Japan). Propidium iodide (PI), Calcein acetoxymethyl ester (Calcein AM),  
504 penicillin-streptomycin, phosphate-buffered saline (PBS), fetal bovine serum (FBS) and  
505 Lipofectamine 2000 (Lipo) were purchased from Thermo Fisher Scientific (USA). Cell  
506 cycle and apoptosis analysis kit were purchased from Beyotime (China). T7  
507 endonuclease I (T7E1) enzyme was purchased from GenScript (USA). Ultrapure water  
508 was used in all experiments. Antibodies used in this project included the following: *Plk1*  
509 antibody (#4535) and anti-GAPDH (#2118) were obtained from Cell Signalling  
510 Technology (USA). 1064 nm low power NIR Laser was purchased from Fingco (China).

### 511 **Synthesis of Gold Nanorods (ARs)**

512 ARs were synthesized using a seed-mediated growth method as previously  
513 described<sup>38,39</sup> with minor modification. Briefly, the seed solution was first synthesized by  
514 adding freshly prepared 600 μL NaBH<sub>4</sub> (10 mM) into 5 mL mixture of HAuCl<sub>4</sub>·3H<sub>2</sub>O (0.5  
515 mM) and CTAB (0.1 M), followed by being kept at 30 °C for 30 min to exhaust excess  
516 NaBH<sub>4</sub>. The growth solution containing a mixture of 5 mL HAuCl<sub>4</sub>·3H<sub>2</sub>O and 5 mL CTAB  
517 (0.2 M), 120 μL AgNO<sub>3</sub> (0.1 M) and 600 μL HQ (0.1 M) were added in sequence. When  
518 the solution color turned from yellow to colorless, 320 μL seed solution was added to the  
519 growth solution. AuNRs with the desired longitudinal surface plasmon resonance (LSPR)  
520 peak were obtained after keeping the reaction mixture undisturbed in dark at 30 °C for 12  
521 h. Finally, the ARs were collected by centrifugation at 7000 rcf for 10 min at 30 °C. The  
522 supernatant was removed and precipitate was resuspended in 2 mL 30 °C ultrapure  
523 water.

### 524 **Synthesis of APC**

525 For the synthesis of AR-PSS, ARs were first coated with PSS by the previous reported  
526 method<sup>65</sup>. In brief, 1 mL of AR solution (0.2 mg/mL Au) were added to 10 mL of PSS (2  
527 mg/mL) dissolved in NaCl (1 mM) solution and stirred for 1 h at 30 °C. A centrifugation  
528 cycle of 7000 rcf for 10 min, and the residue was re-suspended to obtain 2 mL PSS-  
529 coated AR (AR-PSS) solution. β-CD-PEI which was synthesized by our reported  
530 method<sup>40-42</sup> was further coated onto AR-PSS using a similar method. 1 mL of AuNR-PSS

531 were added to 10 mL of  $\beta$ -CD-PEI (2 mg/mL) dispersed in NaCl (1 mM) solution and  
532 stirred for 1 h at 30 °C to obtain AR-PSS- $\beta$ -CD-PEI (APC).

### 533 **Heat-inducible Cas9/dCas9 plasmids construction**

534 To construct HSP70-Cas9-GFP-luciferase-U6-sgRNA plasmid, HSP70 promoter core  
535 sequence<sup>66</sup> was amplified from genomic DNA of 293T cells by PCR and inserted into  
536 pCS2-CMV-Cas9-P2A-GFP-P2A-luciferase-pA (Addgene #48138) by replacing CMV  
537 promoter through Hind III restriction site. U6-sgRNA fragment was also added to the  
538 plasmid by Sall. CMV-Cas9-GFP-luciferase plasmid was constructed by replaced HSP70  
539 promoter with CMV promoter. Other plasmids (HSP-Cas9-U6-gRNA and HSP-Cas9-  
540 GFP-U6-gRNA) were constructed similarly using the same molecular cloning methods.

541 The plasmids of CRISPR-dCas9-based transcriptional activation system were  
542 constructed based on SPH system (an improved dCas9 activation system) according to  
543 the reported literature<sup>67</sup>. In brief, for HSP-dCas9 plasmid, dCas9-10 $\times$ GCN4-P2A-SPH-  
544 T2A-GFP fragment was amplified from AP111 (Addgene #107307) by PCR, and inserted  
545 into the HSP70 promoter backbone plasmid. For exogenous mCherry activation, a weak  
546 promoter miniCMV was ligated to mCherry fragment, and one dCas9 target sequence  
547 (5'-GTCCCCTCCACCCACAGTG-3') was added upstream of miniCMV-mCherry  
548 plasmid. U6-sgRNA plasmid also contained the same target sequence. For endogenous  
549 gene activation, only U6-sgRNA targeted 5'UTR of the candidate gene was co-  
550 transfected with HSP-dCas9 plasmid. The control plasmid CMV-dCas9 was constructed  
551 based on HSP-dCas9 plasmid by replacing its promoter.

### 552 **Targets design and sgRNA plasmids construction**

553 All the targets of candidate genes were designed by online tool platform of Feng Zhang's  
554 lab (<http://crispr.mit.edu/>) and (<http://chopchop.cbu.uib.no/>). Primers and oligos used in  
555 the synthesis of all sgRNA plasmids used in this work are listed in Supplementary Table  
556 2. The annealed oligos were cloned into HSP-Cas9/dCas9 or CMV-Cas9/dCas9  
557 plasmids through BbsI restriction site. The annealing and cloning protocol was followed  
558 to Zhang Lab's website ([www.genomeengineering.org](http://www.genomeengineering.org)).

### 559 **Cell culture and transfection**

560 All mammalian cells (293T, A549, SW480, HeLa, MDA-MB-231, HepG2) were cultured  
561 in Dulbecco's Modified Eagle Medium with high glucose, supplemented with 10% fetal  
562 bovine serum and 1 $\times$  penicillin-streptomycin, and maintained at 37 °C with 5% CO<sub>2</sub>.  
563 Cells were passaged to maintain the confluency below 70%. Cell transfections were  
564 performed using APC or Lipo with 250 ng of Cas9/dCas9 plasmid and 250 ng of sgRNA  
565 plasmid per well for 48-well plate.

### 566 **Gel retardation assays**

567 The ability of APC to complex HSP-Cas9 plasmid DNA was examined through gel  
568 electrophoresis. All the sample stock solutions were prepared at a concentration of 1  
569 mg/mL in distilled water and pH was adjusted to 7.4. Solutions were filtered (0.22  $\mu$ m)  
570 and stored at 4 °C. HSP-Cas9 plasmid (0.2  $\mu$ g in 2 $\mu$ L of TAE buffer) was mixed with an  
571 equal volume of APC solution at the weight ratios between 0 and 10. Each mixture was  
572 vortexed and incubated for approximately 30 min at room temperature and then  
573 analyzed on 2% agarose gel. Gel electrophoresis was carried out in TAE running buffer  
574 (40 mM Tris-acetate, 1 mM EDTA) at 120 V for 40 min in a JUNYI Electrophoresis  
575 Equipment (JY300, Beijing Junyi-Dongfang, China). DNA bands were visualized and  
576 imaged by a Gel Documentation System (c150, Azure Biosystems, USA).

## 577 **In vitro optogenetic activation assay**

578 Transfection studies were performed in human 293T (human embryonic kidney cell line)  
579 and A549 (human lung adenocarcinoma cell line) cells. In brief, 48-well plates were  
580 seeded with cells at a density of  $1.0 \times 10^5$ /well 24 h before transfection in 500 mL DMEM  
581 medium. After 24 h of incubation, the vector/DNA complexes at optimized weight ratios  
582 were prepared by adding the PEI (25 KDa), Lipo or APC into 800 ng of DNA aqueous  
583 solutions with volume of 50  $\mu$ L dropwise, vibrated for a few seconds, and stand for 30  
584 min at room temperature before transfection. The complexes were added into cells and  
585 transfected in the serum-free culture medium for 6 h respectively. Then, the medium was  
586 replaced with 500  $\mu$ L of fresh medium supplemented with 10% FBS. After the incubation  
587 for another 8 h, the samples were irradiated with 1064 nm laser light ( $0.33 \text{ W/cm}^2$ ) for a  
588 total time of 30 min (or other predefined time length) in a discontinuous mode at 37 °C,  
589 which was controlled by the thermal camera (FLIR) to maintain a temperature fluctuation  
590 between 39 °C to 42 °C. The cells were further incubated under the same conditions to  
591 reach a total transfection time of 48 h. Cells were harvested after washing with PBS  
592 twice for T7E1 assay (details were described in the 'T7E1' assay session), or the  
593 measurement of luciferase activities (Single-Luciferase Assay System Kit, Thermo Fisher  
594 Scientific).

## 595 **Cellular uptake, cell cycle and cell apoptosis assay**

596 293T and A549 cells were seeded in a 12-well plate with the density of  $1.5 \times 10^5$  cells  
597 per well, the medium was replaced with serum-free medium after 24 h for transfection.  
598 APC/plasmid complexes (20  $\mu$ L, 0.8  $\mu$ g plasmid) at different APC concentrations were  
599 added into each well. After 6 h incubation, medium was replaced with fresh serum  
600 medium again. After another 2 h, cells were irradiated with 1064 nm laser light ( $0.33$   
601  $\text{W/cm}^2$ ) for 30 min at 37 °C, which was monitored by the thermal camera to ensure the  
602 temperature was always below 42 °C. After being incubated for another 40 h, the cells  
603 were washed with PBS thrice. The measurement was conducted by a flow cytometer  
604 (DxFLEX, Beckman Coulter, USA), using PEI 25 KDa and Lipo as the control. The mean  
605 fluorescence intensity was determined by counting  $1.0 \times 10^4$  single cells. To determine  
606 the effect of APC complex or optogenetic activation of Cas9 on cell cycles, 293T and  
607 A549 cells were cultured in a 6-well plate with a density of  $2.5 \times 10^5$  cells per well, and  
608 then APC complex was added with or without the laser irradiation for 30 min to maintain  
609 the temperature fluctuation between 39-42 °C. The cells were harvested and fixed in pre-  
610 cold 70% ethanol for overnight at 4 °C. Then, 0.1% RNase (Sigma Aldrich) was added,  
611 followed by stained cells with propidium iodide (PI) solution (1  $\mu$ g/ $\mu$ L) at room  
612 temperature for 30 min. Approximately  $1.0 \times 10^4$  cells/sample were analyzed by flow  
613 cytometry (DxFLEX) with an excitation wavelength at 488 nm and an emission  
614 wavelength at 617 nm. Cell apoptosis assay was performed in 293T and A549 cells by  
615 Annexin V-FITC/PI Apoptosis Kit (KeyGEN BioTECH, China).

## 616 **Optogenetic activation of genome editing**

617 293T cells were seeded at a density of  $5.0 \times 10^4$  cells/well in 48-well plate, and were  
618 transfected with APC/HSP-Cas9 (at the weight ratio of 1:2) after 24 h. Lipo was used as  
619 a control. The total amount of DNA was 500 ng per well. After the transfection for 8 h, the  
620 fresh medium was changed, then the cells were exposed to discontinuous irradiation for  
621 30 min with laser light of 1064 nm ( $0.33 \text{ W/cm}^2$ ) at 37 °C. The thermal camera was used  
622 to monitor to maintain the temperature fluctuation between 39-42 °C. After another 40 h  
623 of incubation, genomic DNA was isolated using Trelief Animal Genomic DNA Kit (Cat.

624 No.: TSP201-50, TSINGKE Biological Technology, China). sgRNA targeting *AAVS1*,  
625 *Pik1* and *RHBDF1* were also tested.

### 626 **Optogenetic regulation of transcriptional activation**

627 For dCas9-induced transcriptional activation assay, APC (0.45 µg) was complexed with  
628 three plasmids containing a mixture of HSP-dCas9-SPH (0.30 µg), U6-sgRNA (0.30 µg)  
629 and miniCMV-mCherry (0.30 µg). 48 h later, cell nuclear was stained with Hoechst  
630 33342 and incubated for 15 min. The optogenetic activation of mCherry was visualized  
631 by a confocal laser scanning microscope (LSM-510, CLSM, Carl Zeiss, Germany).

### 632 **T7E1 assay**

633 The disruption in the targeted genome loci in cells were evaluated by T7 Endonuclease I  
634 (T7E1) assay. After the transfection, the cells were harvested to extract genomic DNA  
635 using Trelief Animal Genomic DNA Kit (TSINGKE Biological Technology, China). The  
636 genomic region flanking the Cas9 target site for each gene was amplified by PCR  
637 (primers were listed in the supplementary Table 3), and products were purified using  
638 TIANquick Midi Quantification Kit (TIANGEN BIOTECH,China). A total of 200 ng PCR  
639 products were used to perform T7E1 assay following the manufacturer's protocol. After  
640 the treatment with T7E1, products were analyzed by agarose gel electrophoresis (2% gel)  
641 and imaged with a gel documentation system (c150, Azure Biosystems, USA).  
642 Quantification of the fragmented PCR products was analyzed, and indel percentages  
643 were determined based on relative band intensities. The undigested band and digested  
644 band of gray level was calculated by ImageJ. Indel percentage analysis was calculated  
645 with the following formula:  $[1-(1-\text{fraction cleaved})^{1/2}] \times 100\%$ , where the fraction cleaved  
646 refers to the band intensity of each digested band relative to the band intensity of both  
647 digested bands and undigested band. For the analysis of genome disruption in the edited  
648 tissue, the transfected tissues were first homogenized, and were further analyzed  
649 according to the above protocols.

### 650 **Off-target analysis**

651 The most potential off-target sites that are corresponding to the on-target genome locus  
652 (*AAVS1*, *Pik1* and *RHBDF1*) were identified with an online tool, Cas-OFFinder  
653 (<http://www.rgenome.net/cas-offinder/>). All the off-target sites and primers for PCR  
654 amplification were listed in Supplementary Table 4 and Supplementary Table 5. Off-  
655 target analysis procedure was similar to on-target examination through T7E1 assay. The  
656 sequence of analyzed off-target sites were also evaluated by Sanger sequencing after  
657 the APC-mediated optogenetic activation.

### 658 **In vivo optogenetic regulation of genome editing**

659 Female BALB/c nude mice (6-8 weeks old) were fed in the Laboratory in Animals Centre,  
660 Zhejiang University, and were supplied with sterilized air, water, and food. All animal  
661 treatments or procedures were approved by the Laboratory Animal Welfare and Ethics  
662 Committee of Zhejiang University. For ex vivo transfection, A549 cells were transfected  
663 with APC/HSP-Cas9 complex with 10 µg of plasmid (APC/plasmid = 1:2, weight ratio).  
664 After incubation of 24 h, the transfected cells were trypsinized, suspended in PBS, and  
665 injected into two sides of dorsal part of mice with equal volume of cells (200 µL with  $2.5 \times$   
666  $10^6$  cells). After another 6 h, the right injection site was irradiated with 1064 nm laser light  
667 ( $0.33 \text{ W/cm}^2$ ) with different irradiation time from 5 min to 30 min. The irradiated area was  
668 monitored by the thermal camera to maintain a temperature fluctuation between 39 to 42  
669 °C. At 48 h, D-luciferin (150 mg/kg, 200 µL) in PBS buffer was injected intraperitoneally,

670 and the animals were anesthetized with isoflurane before the luciferase intensity was  
671 evaluated by in vivo imaging system (IVIS® Spectrum, PerkinElmer) 15 min later. For the  
672 intramuscular injection, APC/HSP-Cas9 complexes in 100  $\mu$ L PBS (20  $\mu$ g plasmid, 10  $\mu$ g  
673 APC) were injected into both hind limbs by intramuscular injection. After 8 h, the right  
674 injection site was under discontinuous laser irradiation for 30 min with 1064 nm laser  
675 light (0.33W/cm<sup>2</sup>) at room temperature, and luciferase expression was examined by in  
676 vivo imaging system (IVIS® Spectrum, PerkinElmer). For optogenetic activation in liver,  
677 APC/HSP-Cas9 complexes with 10  $\mu$ g of plasmid (APC/plasmid = 1:2, w/w) were  
678 injected through the tail vein. At 8 h, the liver site was irradiated with 1064 nm laser light  
679 (0.33 W/cm<sup>2</sup>) about 30 min. 48 h later, D-luciferin (150 mg/kg, 200  $\mu$ L) in PBS buffer was  
680 injected intraperitoneally, and the luciferase intensity was evaluated by in vivo imaging  
681 system. For dCas9-mediated transcriptional activation, A549 cells were transfected with  
682 APC/plasmids (APC/plasmid = 1:2, w/w) containing a mixture of HSP-dCas9-SPH (3.33  
683  $\mu$ g), U6-sgRNA (3.33  $\mu$ g) and miniCMV-mCherry (3.33  $\mu$ g). After incubation of 24 h, the  
684 transfected cells was trypsinized, suspended in PBS, and injected into two sides of  
685 dorsal part of mice with equal volume of cells (200  $\mu$ L, 2.5 $\times$  10<sup>6</sup> cells). The irradiation and  
686 in vivo imaging procedure were described above. For transcriptional activation via  
687 intramuscular injection, APC/HSP-dCas9-SPH complexes in 100  $\mu$ L PBS (HSP-dCas9-  
688 SPH (6.33  $\mu$ g), U6-sgRNA (6.33  $\mu$ g) and miniCMV-mCherry (6.33  $\mu$ g) plasmid, 10  $\mu$ g  
689 APC) were injected into both hind limbs by intramuscular injection. The irradiation and in  
690 vivo imaging procedure were similar as above.

### 691 **In vivo optogenetic genome editing for inhibition of tumor growth**

692 The xenografted tumors were inoculated by subcutaneous injections of 2  $\times$  10<sup>6</sup> A549  
693 cells (suspended in 0.2 ml of PBS) on the back of the nude mice. When the tumor size  
694 reached about 80 mm<sup>3</sup>, APC/HSP-Cas9 complex containing 10  $\mu$ g of PCS2-HSP-Cas9-  
695 luciferase-U6-sg*Plk1* and 25  $\mu$ L APC complex (5  $\mu$ M) was injected through the peritumor  
696 injection. The injected mice were randomly assigned to five groups with five mice in each  
697 group. After the injection, the nude mice were discontinuously irradiated for 30 min with  
698 1064 nm laser light (0.33 W/cm<sup>2</sup>) at room temperature, and the thermal camera was  
699 used to control the temperature fluctuations from 39 to 42 °C. 48 h later, the mice were  
700 anesthetized with isoflurane before the luciferase intensity was evaluated by in vivo  
701 imaging system (IVIS® Spectrum, PerkinElmer). Injections were conducted twice a week  
702 and the treatment continued for almost three weeks. At each time point, vernier calipers  
703 were applied to measure the size of solid tumors. Tumor volume was calculated by the  
704 following formula: Tumor volume = [length of tumor  $\times$  (width of tumor)<sup>2</sup>]/2. On day 22, the  
705 treated mice were sacrificed and tumor weight was recorded.

### 706 **Statistical analysis**

707 Cell viability, tumor volume and tumor weight were calculated by expressing the mean  $\pm$   
708 standard deviation (S.D.). The statistical significance was analyzed using Students' t-test.  
709 The p-value less than 0.05 was considered significant (\*p < 0.05, \*\*p < 0.01, \*\*\*p < 0.001,  
710 \*\*\*\*p < 0.0001). All data and Figures in this paper were analyzed and plotted by  
711 Graphpad prism 8.0.

### 712 **References**

- 714 1. Jinek, M. et al. A programmable dual-RNA-guided DNA endonuclease in adaptive  
715 bacterial immunity. *Science* **337**, 816–821 (2012).

- 716 2. Cox, D.B., Platt, R. J. & Zhang, F. Therapeutic genome editing: prospects and  
717 challenges. *Nat. Med.* **21**, 121–131 (2015).
- 718 3. Wan, T. et al. Material solutions for delivery of CRISPR/Cas-based genome editing  
719 tools: current status and future outlook. *Mater. Today* 2018.12.003.
- 720 4. Nishimasu, H. et al. Crystal structure of Cas9 in complex with guide RNA and target  
721 DNA. *Cell* **156**, 935–949 (2014).
- 722 5. Wang, H. X. et al. CRISPR/Cas9-Based genome editing for disease modeling and  
723 therapy: challenges and opportunities for nonviral delivery. *Chem. Rev.* **117**, 9874–  
724 9906 (2017).
- 725 6. Mout, R., Ray, M., Lee, Y. W., Scaletti, F. & Rotello, V. M. In vivo delivery of  
726 CRISPR/Cas9 for therapeutic gene editing: progress and challenges. *Bioconjug.*  
727 *Chem.* **28**, 880–884 (2017).
- 728 7. Yang, L. et al. Genome-wide inactivation of porcine endogenous retroviruses  
729 (PERVs). *Science* **350**, 1101–1104 (2015).
- 730 8. Jin, L. & Li, J. Generation of genetically modified mice using CRISPR/Cas9 and  
731 haploid embryonic stem cell systems. *Zool. Res.* **37**, 205–213 (2016).
- 732 9. Min, Y. L., Bassel-Duby, R. & Olson, E. N. CRISPR correction of duchenne muscular  
733 dystrophy. *Annu. Rev. Med.* **70**, 239–255 (2019).
- 734 10. Yang, Y. et al. A dual AAV system enables the Cas9-mediated correction of a  
735 metabolic liver disease in newborn mice. *Nat. Nanotech.* **34**, 334–338 (2016).
- 736 11. Shalem, O., Sanjana, V. M. & Zhang, F. High-throughput functional genomics using  
737 CRISPR–Cas9. *Nat. Rev. Genet.* **16**, 299–311 (2015).
- 738 12. Joung, J. et al. Genome-scale CRISPR-Cas9 knockout and transcriptional activation  
739 screening. *Nat. Protoc.* **12**, 828–863 (2017).
- 740 13. Ting, P. Y. et al. Guide swap enables genome-scale pooled CRISPR–Cas9  
741 screening in human primary cells. *Nat. Methods* **15**, 941–946 (2018).
- 742 14. Manguso, R. T. et al. In vivo CRISPR screening identifies Ptpn2 as a cancer  
743 immunotherapy target. *Nature* **547**, 413–418 (2017).
- 744 15. Yamauchi, T. et al. Genome-wide CRISPR-Cas9 screen identifies leukemia-specific  
745 dependence on a pre-mRNA metabolic pathway regulated by DCPS. *Cancer Cell* **33**,  
746 386–400 (2018).
- 747 16. Liao, H. et al. Use of the CRISPR/Cas9 system as an intracellular defense against  
748 HIV-1 infection in human cells. *Nat. Commun.* **6**, 6413 (2015).
- 749 17. Scoppe, J. A. & Lebbink, R. J. Antiviral goes viral: harnessing CRISPR/Cas9 to  
750 combat viruses in humans. *Trends Microbiol.* **25**, 833–850 (2017).
- 751 18. Liu, K. I. et al. A chemical-inducible CRISPR–Cas9 system for rapid control of  
752 genome editing. *Nat. Chem. Biol.* **12**, 980–987 (2016).
- 753 19. Aubrey, B. J. et al. An inducible lentiviral guide RNA platform enables the  
754 identification of tumor-essential genes and tumor-promoting mutations in vivo. *Cell*  
755 *Rep.* **10**, 1422–1432 (2015).
- 756 20. Cha, P. H. et al. Small-molecule binding of the axin RGS domain promotes  $\beta$ -catenin  
757 and Ras degradation. *Nat. Chem. Biol.* **12**, 593–600 (2016).
- 758 21. Dow, L. E. et al. Inducible in vivo genome editing with CRISPR-Cas9. *Nat.*  
759 *Biotechnol.* **33**, 390–394 (2015).
- 760 22. Nguyen, D. P. et al. Ligand-binding domains of nuclear receptors facilitate tight  
761 control of split CRISPR activity. *Nat. Commun.* **7**, 12009. (2016).
- 762 23. Zhou, X. X. et al. A single-chain photoswitchable CRISPR-Cas9 architecture for light-  
763 inducible gene editing and transcription. *ACS Chem. Biol.* **13**, 443–448 (2018).
- 764 24. Hemphill, J., Borchardt, E. K., Brown, K., Asokan, A. & Deiters, A. Optical control of  
765 CRISPR/Cas9 gene editing. *J. Am. Chem. Soc.* **137**, 5642–5645 (2015).



- 766 25. Nihongaki, Y., Yamamoto, S., Kawano, F., Suzuki, H. & Sato, M. CRISPR/Cas9-  
767 based photoactivatable transcription system. *Chem. Biol.* **22**, 169–174 (2015).
- 768 26. Nihongaki, Y., Kawano, F., Nakajima, T. & Sato, M. Photoactivatable CRISPR-Cas9  
769 for optogenetic genome editing. *Nat. Biotechnol.* **33**, 755–760 (2015).
- 770 27. Zetsche, B. Volz, S. E. & Zhang, F. A split-Cas9 architecture for inducible genome  
771 editing and transcription modulation. *Nat. Biotechnol.* **33**(2), 139–142 (2015).
- 772 28. Maji, B. et al. Multidimensional chemical control of CRISPR–Cas9. *Nat. Chem. Biol.*  
773 **13**, 9. (2016).
- 774 29. Davis, K. M., Pattanayak, V., Thompson, D. B., Zuris, J. A. & Liu, D. R. Small  
775 molecule–triggered Cas9 protein with improved genome-editing specificity. *Nat.*  
776 *Chem. Biol.* **11**(5), 316–318. (2015).
- 777 30. Hilton, I. B. & Gersbach, C. A. Chemical control for CRISPR editing. *Nat. Chem.*  
778 *Biol.* **13**, 2. (2016).
- 779 31. P. K. et al. Development of light-activated CRISPR using guide RNAs with  
780 photocleavable protectors. *Angew. Chem. Int. Ed.* **55**, 12440–12444 (2016).
- 781 32. Polstein, L. R. & Gersbach, C. A. A light-inducible CRISPR-Cas9 system for control  
782 of endogenous gene activation. *Nat. Chem. Biol.* **11**, 198–200 (2015).
- 783 33. Bubeck, F. et al. Engineered anti-CRISPR proteins for optogenetic control of  
784 CRISPR–Cas9. *Nat. Methods* **15**, 924–927 (2018).
- 785 34. Shao, J. et al. Synthetic far-red light-mediated CRISPR-dCas9 device for inducing  
786 functional neuronal differentiation. *Proc. Natl. Acad. Sci. USA* **115**, E6722–E6730  
787 (2018).
- 788 35. Pan, Y. et al. Near-infrared upconversion–activated CRISPR-Cas9 system: a  
789 remote-controlled gene editing platform. *Sci. Adv.* **5**, eaav7199 (2019).
- 790 36. Mosser, D. D., Duchaine, J. & Massie, B. The DNA-binding activity of the human  
791 heat shock transcription factor is regulated in vivo by hsp70. *Mol. Cell. Biol.* **13**,  
792 5427–5438 (1993).
- 793 37. Abravaya, K., Myers, M. P., Murphy, S. P. & Morimoto, R. I. The human heat shock  
794 protein hsp70 interacts with HSF, the transcription factor that regulates heat shock  
795 gene expression. *Genes Dev.* **6**, 1153–1164 (1992).
- 796 38. Li, X. et al. In vitro and in vivo photothermal cancer therapeutic effects of gold  
797 nanorods modified with mushroom  $\beta$ -glucan. *J. Agric. Food Chem.* **66**, 4091–4098  
798 (2018).
- 799 39. Chen, Y., Zhao, Y., Yoon, S. J., Gambhir, S. S. & Emelianov, S. Miniature gold  
800 nanorods for photoacoustic molecular imaging in the second near-infrared optical  
801 window. *Nat. Nanotech.* DOI: 10.1038/s41565-019-0392-3 (2019).
- 802 40. Hu, Q. et al. Engineering nanoparticle-coated bacteria as oral DNA vaccines for  
803 cancer immunotherapy. *Nano Lett.* **15**, 2732–2739 (2015).
- 804 41. Wu, M. et al. Targeting ETS1 with RNAi-based supramolecular nanoassemblies for  
805 multidrug-resistant breast cancer therapy. *J. Control. Release* **253**, 110–121 (2017).
- 806 42. Zhang, Z. et al. Cationic polymer-mediated CRISPR/Cas9 plasmid delivery for  
807 genome editing. *Macromol. Rapid Commun.*, 1800068 (2018).
- 808 43. Andersson, H. A. et al. HSP70 promoter-driven activation of gene expression for  
809 immunotherapy using gold nanorods and near infrared light. *Vaccines* **2**, 216–227  
810 (2014).
- 811 44. Vanzetti, L. et al. XPS analysis of genomic DNA adsorbed on PEI-modified surfaces.  
812 *Surf. Interface Anal.* **48**, 611-615 (2016).
- 813 45. Islam, M. S., Choi, W. S. & Lee, H. J. Controlled etching of internal and external  
814 structures of SiO<sub>2</sub> nanoparticles using hydrogen bond of polyelectrolytes. *ACS Appl.*  
815 *Mater. Interfaces* **6**. 12, 9563–9571 (2014).

- 816 46. Xiang, G., Zhang, X., An, C., Cheng, C. & Wang, H. Temperature effect on CRISPR-  
817 Cas9 mediated genome editing. *J. Genet. Genomics* **44**, 199–205 (2017).
- 818 47. Wang, P. et al. Thermo-triggered release of CRISPR-Cas9 system by lipid-  
819 encapsulated gold nanoparticles for tumor therapy. *Angew. Chem. Int. Ed.* **57**, 1491–  
820 1496 (2018).
- 821 48. Ma, W. et al. Dual quantification of microRNAs and telomerase in living cells. *J. Am.*  
822 *Chem. Soc.* **139**, 11752–11759 (2017).
- 823 49. Chen, S. et al. Near-infrared deep brain stimulation via upconversion nanoparticle-  
824 mediated optogenetics. *Science* **359**, 679–684 (2018).
- 825 50. Tan, P., He, L., Han, G. & Zhou, Y. Optogenetic immunomodulation: shedding light  
826 on antitumor immunity. *Trends Biotechnol.* **35**, 215–226 (2017).
- 827 51. Jiang, Y. et al. Metabolizable semiconducting polymer nanoparticles for second  
828 near-infrared photoacoustic imaging. *Adv. Mater.* **31**, 1808166 (2019).
- 829 52. Zhu, S., Tian, R., Antaris, A. L., Chen, X. & Dai, H., Near-infrared-II molecular dyes  
830 for cancer imaging and surgery. *Adv. Mater.* **14**, 1900321 (2019)
- 831 53. Hong, G., Antaris, A. L. & Dai, H., Near-infrared fluorophores for biomedical imaging.  
832 *Nat. Biomed. Eng.* **1**, 0010 (2017).
- 833 54. Conde, J., Oliva, N., Zhang, Y. & Artzi, N. Local triple-combination therapy results in  
834 tumour regression and prevents recurrence in a colon cancer model. *Nat. Mater.* **15**,  
835 1128–1138 (2016).
- 836 55. Hinde, E. et al. Pair correlation microscopy reveals the role of nanoparticle shape in  
837 intracellular transport and site of drug release. *Nat. Nanotechnol.* **12**, 81–89 (2017).
- 838 56. Morimoto, R. Cells in stress: transcriptional activation of heat shock genes. *Science*  
839 **259**, 1409–1410 (1993).
- 840 57. Abravaya, K., Phillips, B. & Morimoto, R. I. Attenuation of the heat shock response in  
841 HeLa cells is mediated by the release of bound heat shock transcription factor and is  
842 modulated by changes in growth and in heat shock temperatures. *Genes Dev.* **5**,  
843 2117–2127 (1991).
- 844 58. Lyu, Y. et al. Dendronized semiconducting polymer as photothermal nanocarrier for  
845 remote activation of gene expression. *Angew. Chem. Int. Ed.* **56**, 9155–9159 (2017).
- 846 59. Miyako, E. et al. Photothermic regulation of gene expression triggered by laser-  
847 induced carbon nanohorns. *Proc. Natl Acad. Sci. USA* **109**, 7523–7528 (2012).
- 848 60. Nakatsuji, H., Galbraith, K. K., Kurisu, J., Imahori, H., Murakami, T. & Kengaku, M.  
849 Surface chemistry for cytosolic gene delivery and photothermal transgene  
850 expression by gold nanorods. *Sci. Rep.* **7**, 4694 (2017).
- 851 61. Raj, B. et al. Simultaneous single-cell profiling of lineages and cell types in the  
852 vertebrate brain. *Nat. Biotechnol.* **36**, 442–450 (2018).
- 853 62. Yen, S. T. et al. Somatic mosaicism and allele complexity induced by CRISPR/Cas9  
854 RNA injections in mouse zygotes. *Dev. Biol.* **393**, 3–9 (2014).
- 855 63. Wang, H. et al. One-step generation of mice carrying mutations in multiple genes by  
856 CRISPR/Cas-mediated genome engineering. *Cell* **153**, 910–918 (2013).
- 857 64. Gangopadhyay, S. A. et al. Precision control of CRISPR/Cas9 using small molecules  
858 and light. *Biochemistry* **58**, 234–244 (2019).
- 859 65. B. Wang, X. Yu, J. Wang, Z. Li, P. Li, H. Wang, L. Song, P. K. Chu, C. Li, Gold-  
860 nanorods-siRNA nanoplex for improved photothermal therapy by gene silencing.  
861 *Biomaterials* **78**, 27–39 (2016).
- 862 66. Li, S. et al. A novel inducible lentiviral system for multi-gene expression with human  
863 HSP70 promoter and tetracycline-induced promoter. *Appl. Microbiol. Biotechnol.* **101**,  
864 9, 3689–3702 (2017).

865 67. Zhou, H. B. et al. In vivo simultaneous transcriptional activation of multiple genes in  
866 the brain using CRISPR-dCas9-activator transgenic mice. *Nat. Neurosci.* **21**, 440–  
867 446 (2018).

## 868 **Acknowledgments**

869 The authors gratefully acknowledge the National Natural Science Foundation of China  
870 (81872807), Fundamental Research Funds for the Central Universities (2018XZZX001-  
871 14), and Thousand Talents Plan (Y.P.), for the financial support of this work. The  
872 authors also acknowledge Dr. D. Wu for the helpful discussion on the synthesis of gold  
873 nanorod, and S. Zhang for the help in the construction of plasmids.  
874  
875

## 876 **Author contribution**

877 Y.P. conceived the project and designed experiment. X.C. performed in vitro and in vivo  
878 experiments. Y.C. synthesized and characterized polymer-coated gold materials. H.X.  
879 constructed the plasmids. T.W., H.X. and Y.P. planned and interpreted the data. Y.P.  
880 supervised the project, and wrote manuscript.  
881  
882

883 **Conflict of Interest:** The authors declare no conflict of interest.  
884

## 885 **Additional information**

886 Supplementary material is available for this manuscript.  
887  
888

889

## Fig.s and Schemes

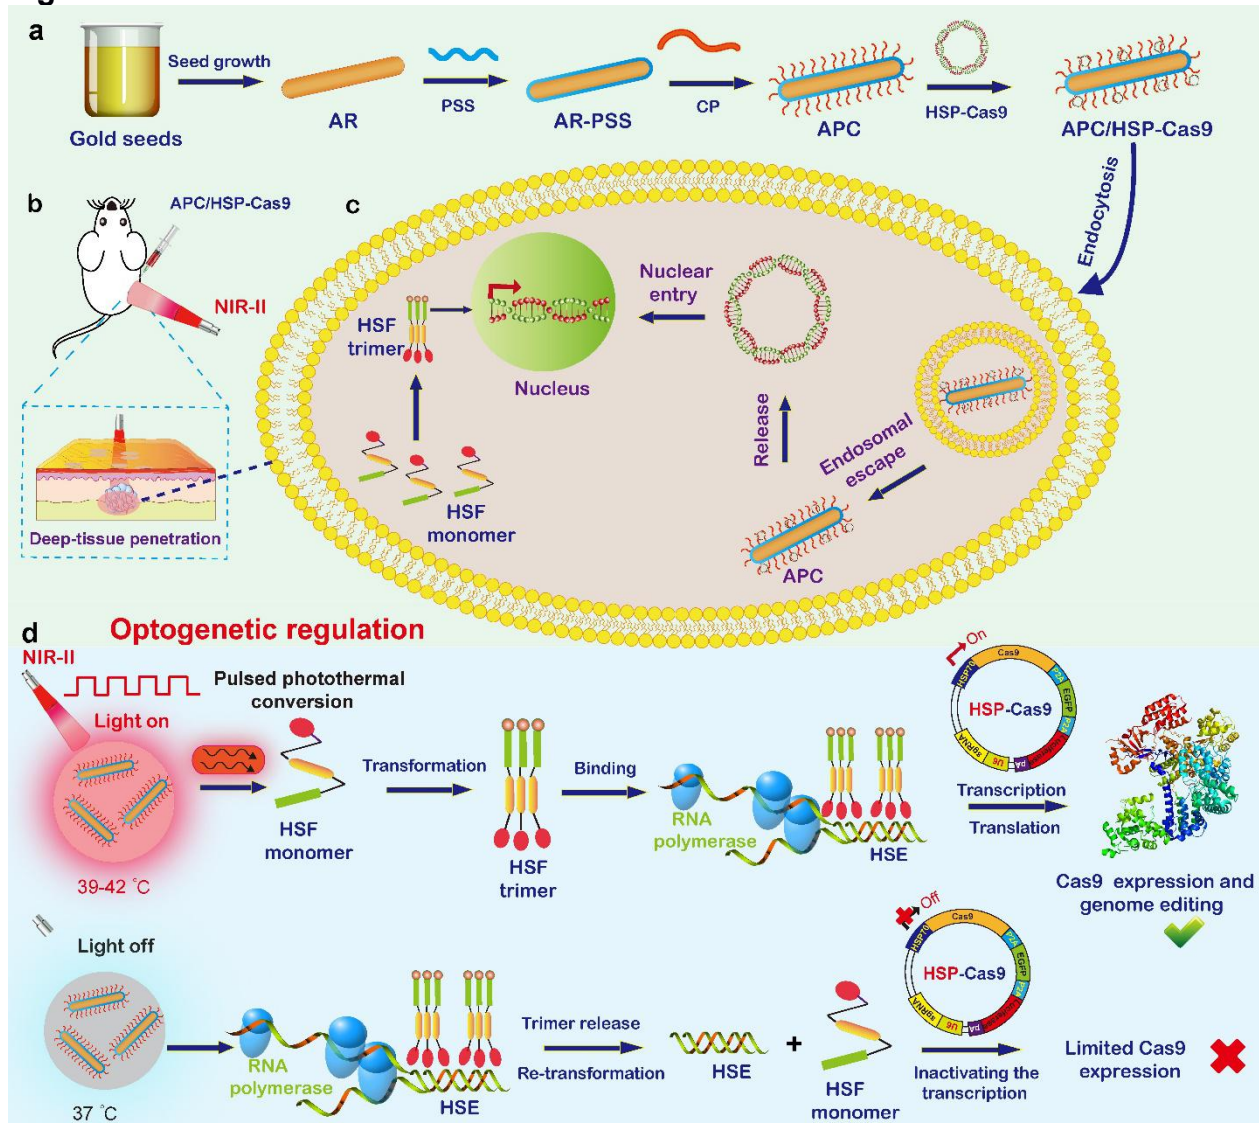

890

891

892

893

894

895

896

**Scheme 1. Illustration of the optogenetic regulation of genome editing mediated by photoactivatable CRISPR/Cas9 nanosystem. (a)** Process of preparation of APC/HSP complex; **(b)** Illustration of deep-tissue penetration by NIR-II light; **(c)** Intracellular delivery of APC/HSP-Cas9 complexes; **(d)** Mechanism of reversible optogenetic regulation of Cas9 expression and genome editing.

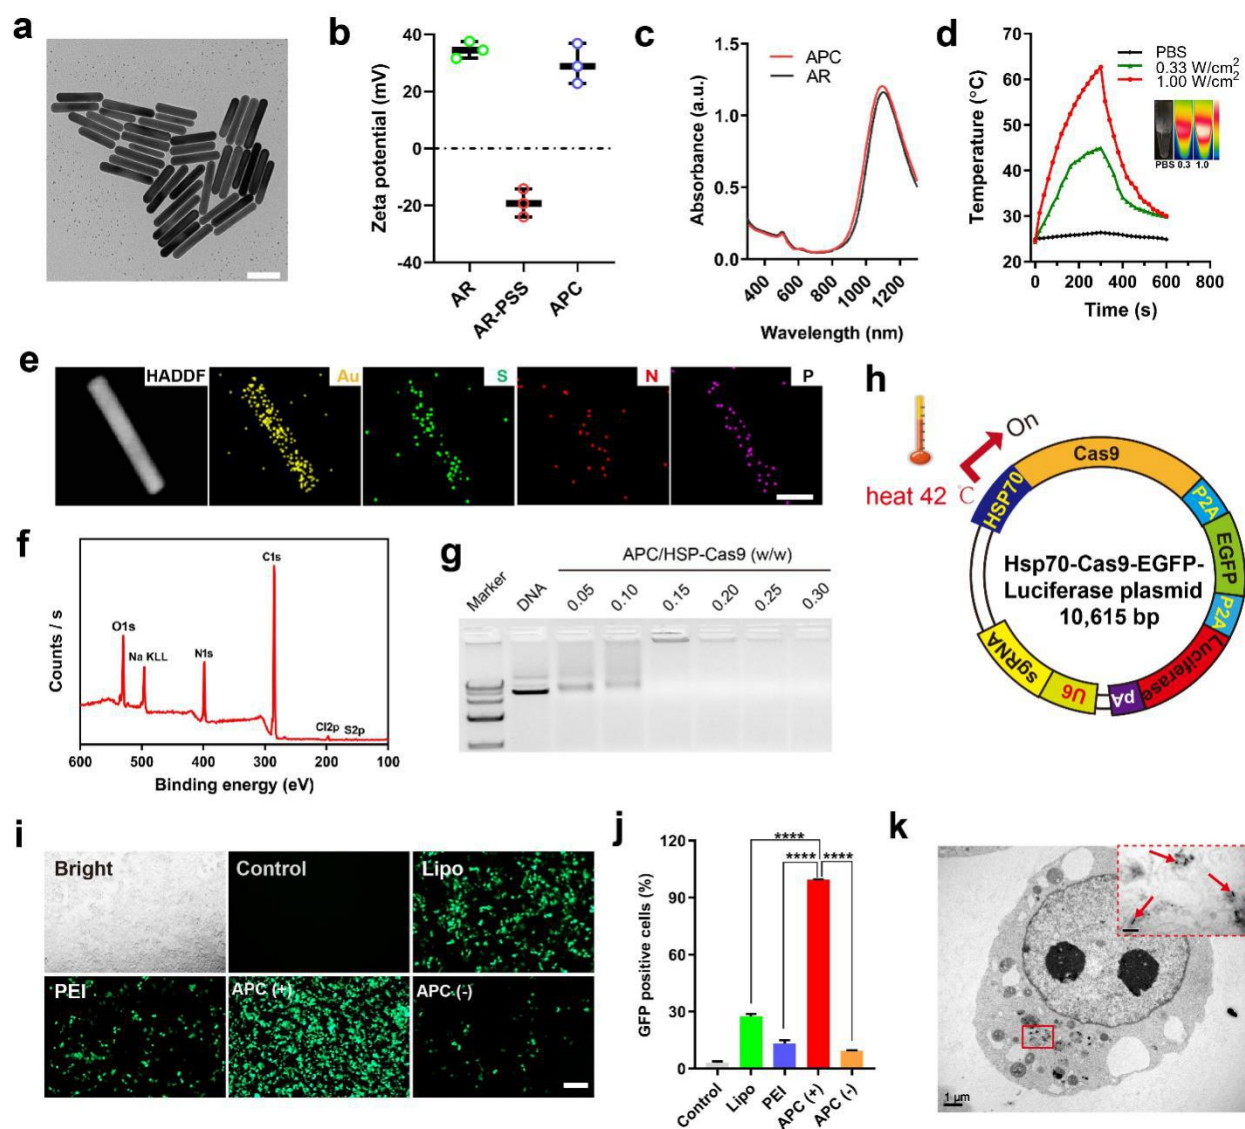

897

898 **Fig. 1. Characterization of APC and evaluation of transfection activity.** **a**. TEM image of  
 899 APC. **b**. Zeta potential analysis of gold nanorods (AR), PSS-coated AR, and APC. Mean  $\pm$  S.D.,  
 900  $n = 3$ . **c**. Absorption spectrum of AR and APC. **d**. Solution temperature of APC as a function of  
 901 laser irradiation time. The laser wavelength was 1064 nm. Insert, thermal image of PBS solution  
 902 at a laser power density of 0.33 W/cm<sup>2</sup> (left), APC solution at a power density of 0.33 W/cm<sup>2</sup>  
 903 (middle), and 1.00 W/cm<sup>2</sup> (right) at their respective maximum temperature. **e**. HADDF-STEM  
 904 and EDS mapping of APC/HSP-Cas9. The scale bar indicates 25 nm. **f**. XPS spectra of  
 905 APC/HSP-Cas9 complexes. **g**. Agarose gel electrophoresis of APC/HSP-Cas9 complexes at  
 906 various APC/DNA weight ratios. **h**. HSP70 promoter-driven CRISPR/Cas9 plasmid (HSP-Cas9).  
 907 The plasmid consists of a Cas9 gene driven by a HSP70 promoter, an EGFP reporter and a  
 908 luciferase reporter downstream of Cas9, separated by self-cleaving peptides P2A. A segment of  
 909 independent sgRNA sequence which is driven by U6 promoter was further inserted in the  
 910 downstream of luciferase reporter. **i**. GFP expression mediated by APC/HSP-Cas9 with (+) or  
 911 without (-) laser irradiation at 1064 nm. Lipo- and PEI-mediated transfections at 42 °C were  
 912 used as positive controls, whereas cells without any treatment were used as a negative control.  
 913 The scale bar represents 200  $\mu$ m. **j**. Flow cytometry analysis of GFP-positive cells. Mean  $\pm$  S.D.,  $n =$   
 914 3, \*\*\*  $P < 0.001$ . **k**. Bio-TEM image of 293T cells after the transfection of APC/HSP-Cas9  
 915 complexes. The arrows in the image show the presence of APC in the cytoplasm.

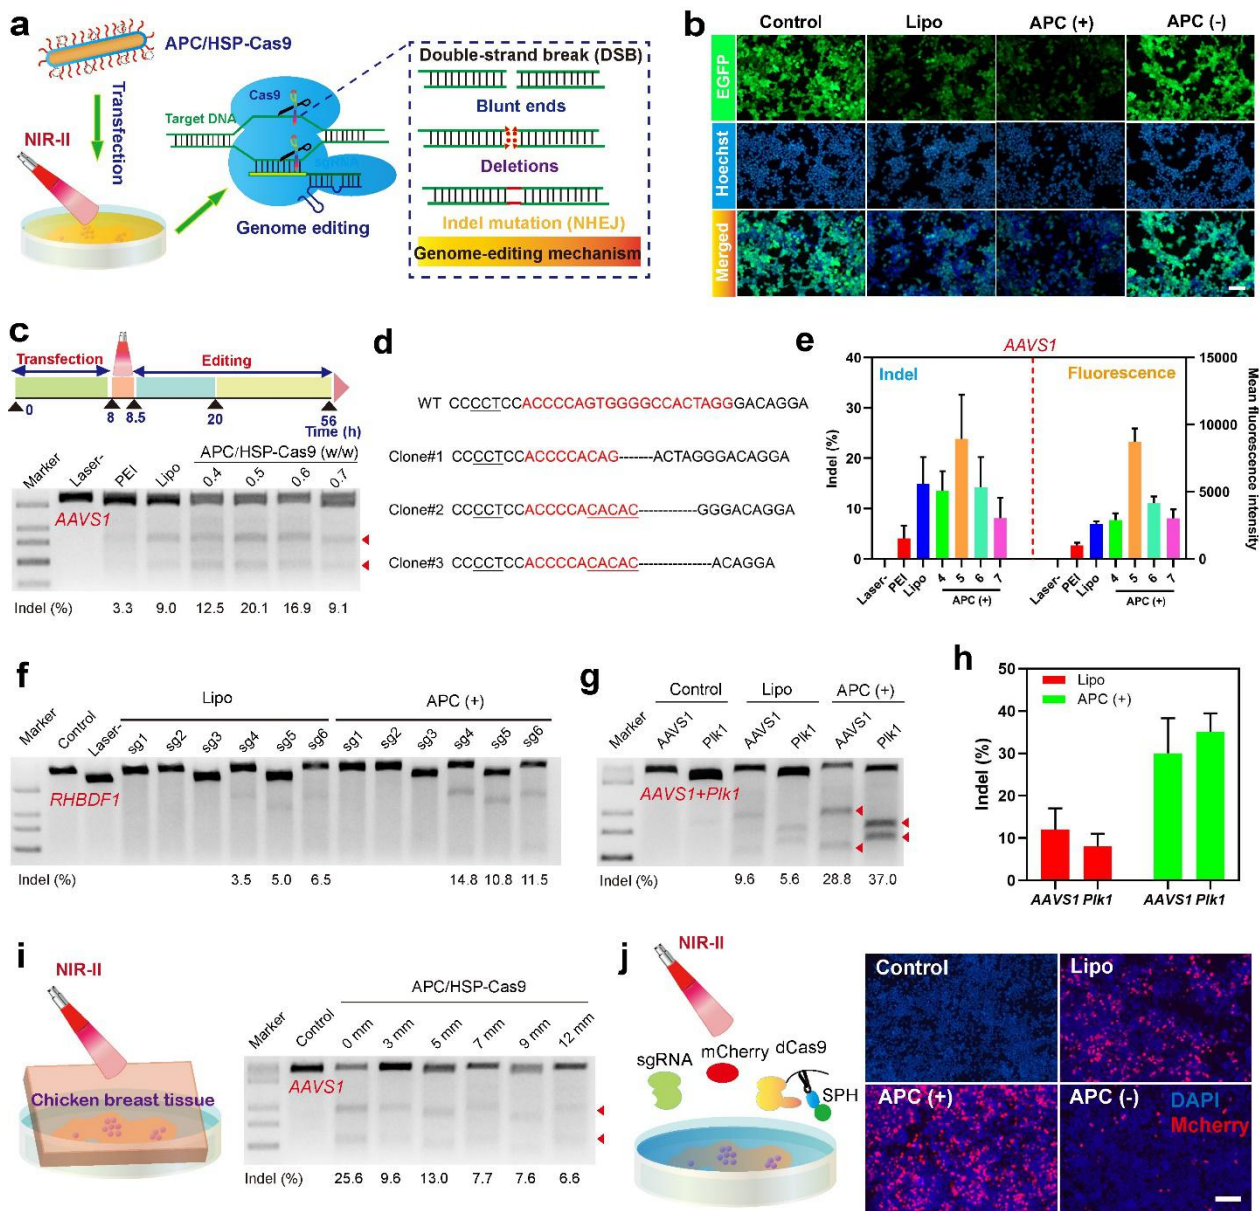

**Fig. 2. Optogenetic activation of CRISPR/Cas9 genome editing by APC/HSP-Cas9.** **a.** Illustration of optogenetic activation mediated by APC. **b.** CLSM images of 293T-EGFP cells treated with APC/HSP-Cas9 targeting EGFP, followed by optogenetic activation. Lipo-mediated transfection at 42 °C and APC-mediated transfection without irradiation were used as controls. The scale bar represents 200  $\mu$ m. **c.** Indel mutations of AAVS1 locus of 293T cells transfected APC/HSP-Cas9 complexes with or without laser irradiation. APC was complexed with HSP-Cas9 at different weight ratios. Lipo and PEI were used as positive controls. **d.** Sanger sequencing results of T-A cloning from 293T cells (AAVS1) after APC-mediated transfection and optogenetic activation. The target sequences were marked in red. PAM was underlined (black). Substitutions, insertions and deletions were marked by red base sequences, underlines (red), and dotted lines, respectively. **e.** Analysis of indel rate, as revealed by the grayscale density of cut bands from T7E1 results, after the transfection of ACP/HSP-Cas9 targeting AAVS1 with or without laser treatment (left panel). The corresponding GFP expression was evaluated. 4, 5, 6, and 7 refer to APC/HSP-Cas9 weight ratio 0.4, 0.5, 0.6 and 0.7, respectively. Mean  $\pm$  S.D., n = 3. **f.** Indel mutations from 293T cells transfected APC/HSP-Cas9 targeting RHBDF1 with or without laser irradiation. **g.** Indel mutation from multiplex genome editing by ASP/HSP-Cas9 targeting Plk1 and AAVS1 with the laser irradiation. **h.** Quantitative analysis of indel mutations after the multiplex editing at Plk1 and AAVS1 loci after the transfection of APC/HSP-Cas9 and

935 optogenetic activation in 293T cells. Mean  $\pm$  S.D.,  $n = 3$ . **i.** Illustration of cultured cells exposed to  
 936 the irradiation in the presence of a piece of chicken breast tissue (left). Indel mutations of *AAVS1*  
 937 locus from 293T transfected with APC/HSP-Cas9, followed by the irradiation in the presence of  
 938 the breast chicken tissue of different thickness (right). **j.** Illustration of optogenetic regulation of  
 939 transcriptional activation *in vitro* (left). Optogenetic activation of mCherry expression after the co-  
 940 transfection of plasmids of HSP-dCas9-SPH, miniCMV-mCherry and U6-sgRNA by APC (right).

941

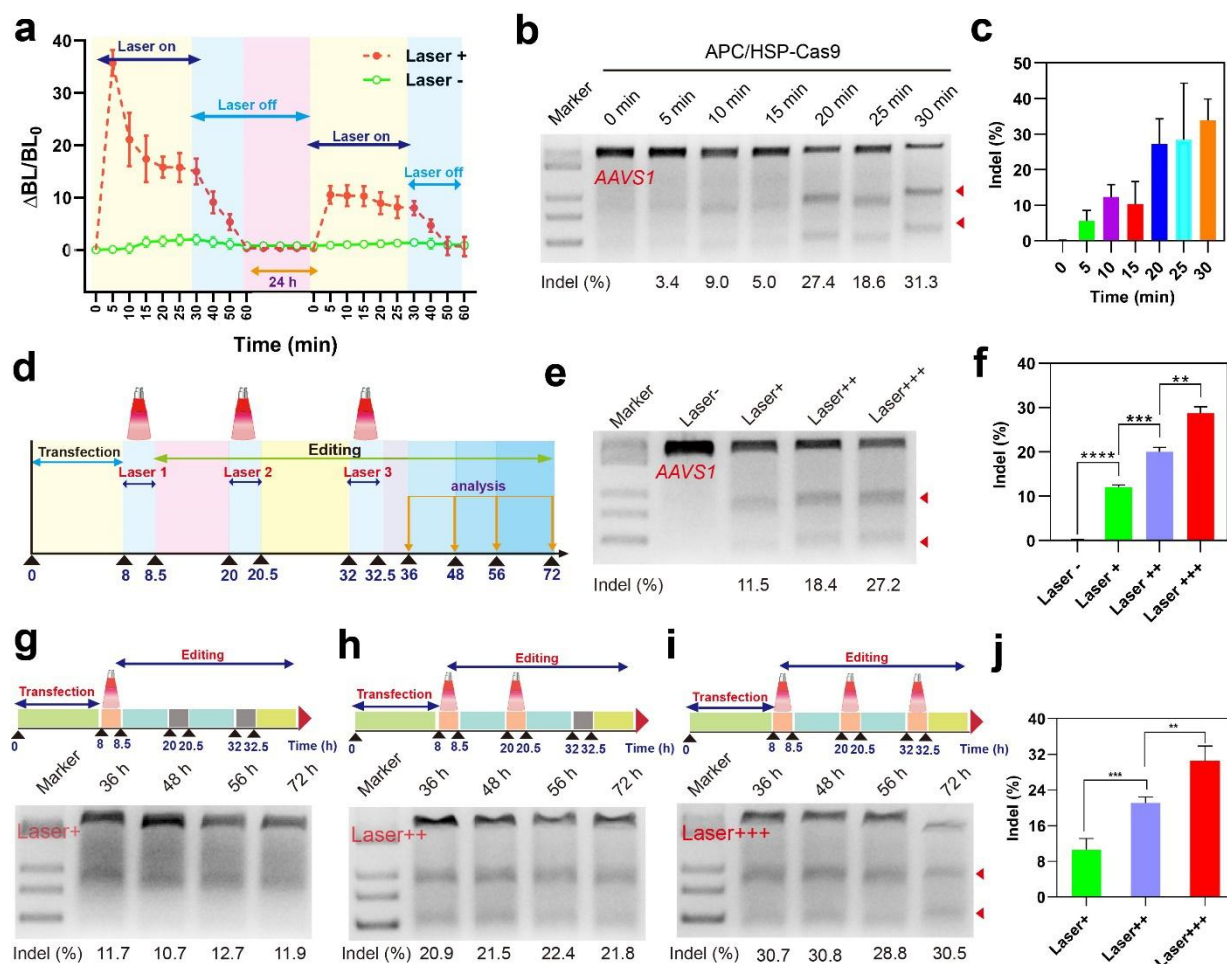

942

943 **Fig. 3. APC-mediated optogenetic control of programmable genome editing in vitro.** **a.**  
 944 Quantitative analysis of changes in luminescence intensity. The incremental percentage of BL  
 945 intensities was monitored as a function of time. **b.** Indel mutations of *AAVS1* locus detected by  
 946 T7E1 assay. 293T cells were first transfected with APC/HSP-Cas9 complexes, and then exposed  
 947 to the laser irradiation from 5 to 30 min. The indel mutations were evaluated 72 h after the  
 948 irradiation. **c.** Quantitative analysis of indel mutations at *AAVS1* locus. The experiment conditions  
 949 were same as those described in Fig. 3B. Mean  $\pm$  S.D.,  $n = 3$ . **d.** Illustration of transfection,  
 950 irradiation and genome editing processes. The irradiations were conducted at 8 h, 20 h, and 32 h  
 951 after the transfection, and irradiation time was 30 min each time. The indel analysis was  
 952 conducted at 36 h, 48 h, 56 h, and 72 h, respectively. **e.** Indel mutations of *AAVS1* locus  
 953 detected by T7E1 assay. The irradiation was conducted at 8 h (Laser+), 8 h and 20 h (Laser++),  
 954 and 8 h, 20 h, and 32 h (Laser+++). The indel mutations were analyzed at 72 h after the transfection.  
 955 **f.** Quantitative analysis of indel mutations at *AAVS1* locus after the transfected cells exposed to the  
 956 irradiation for different times. Mean  $\pm$  S.D.,  $n = 3$ . **g-i.** Indel mutations of *AAVS1* locus  
 957 detected by T7E1 assay after the exposure to irradiation for different times. The irradiation was  
 958 conducted at 8 h (Laser+), 8 h and 20 h (Laser++), and 8 h, 20 h, and

959 32 h (Laser+++), after the transfection, and the cells were harvested at 36 h, 48 h, 56 h, and 72 h  
 960 for indel analysis. **j.** Quantitative analysis of T7E1 results in Fig. **g-i.** Mean  $\pm$  S.D.,  $n = 3$ .

961

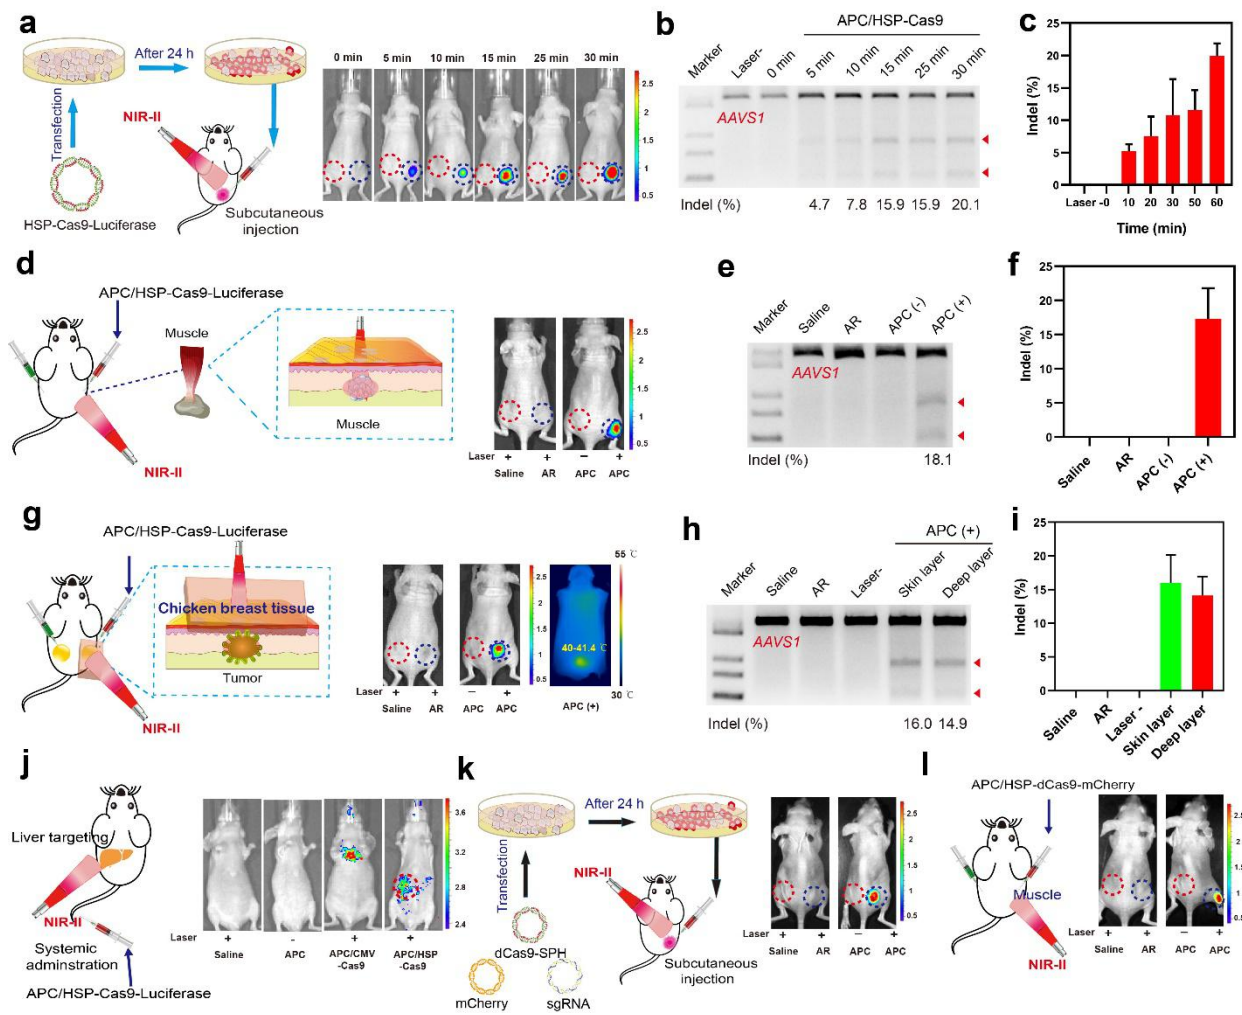

962

963 **Fig. 4. APC-mediated optogenetic control of programmable genome editing in vivo. (a-c).**  
 964 Evaluation of in vivo genome editing through ex vivo transfection followed by in vivo activation. **a.**  
 965 Schematic illustration (left). A549 cells were first transfected with APC/HSP-Cas9 complexes,  
 966 and were then implanted subcutaneously. Whereas the right implanted position was exposed to  
 967 irradiation from 5 to 30 min, the left position that was not exposed to irradiation was used as the  
 968 control. In vivo luciferase expression (right). **b.** Indel mutations detected by T7E1 assay. **c.**  
 969 Quantitative analysis of indel mutations. **(d-f)** Evaluation of direct in vivo transfection followed by  
 970 optogenetic activation. **d.** Schematic illustration (left). APC/HSP-Cas9 complexes were  
 971 subcutaneously injected into the muscle of the hind limb of BALB/c mice, followed by the  
 972 irradiation at 1064 nm. In vivo luciferase expression (right). **e.** Indel mutations detected by T7E1  
 973 assay. **f.** Quantitative analysis of indel mutations. **(g-i)** Evaluation of in vivo genome editing  
 974 through in vivo local transfection followed by optogenetic activation in the tumor tissue. **g.**  
 975 Schematic illustration (left). Tumor-bearing mice were administered with APC/HSP-Cas9  
 976 complexes through peritumoral injection, and the right tumor was then exposed to the irradiation  
 977 for 30 min. In vivo luciferase expression (middle), and local tumor temperature during the  
 978 optogenetic process, as monitored by a thermal camera (right). **h.** Indel mutations detected by  
 979 T7E1 assay. **i.** Quantitative analysis of indel mutations. **j** Evaluation of in vivo luciferase  
 980 expression through intravenous injection, followed by the optogenetic activation in the liver.  
 981 Schematic illustration (left). BALB/c mice were injected with APC/HSP-Cas9 complexes via tail-  
 982 vein injection, and the liver position was exposed to the irradiation for 30 min after the



983 transfection. (k-l). Optogenetic regulation of transcriptional activation. k. Schematic illustration.  
 984 mCherry expression through ex vivo transfection and in vivo optogenetic activation. l. mCherry  
 985 expression through in vivo transfection and optogenetic activation.

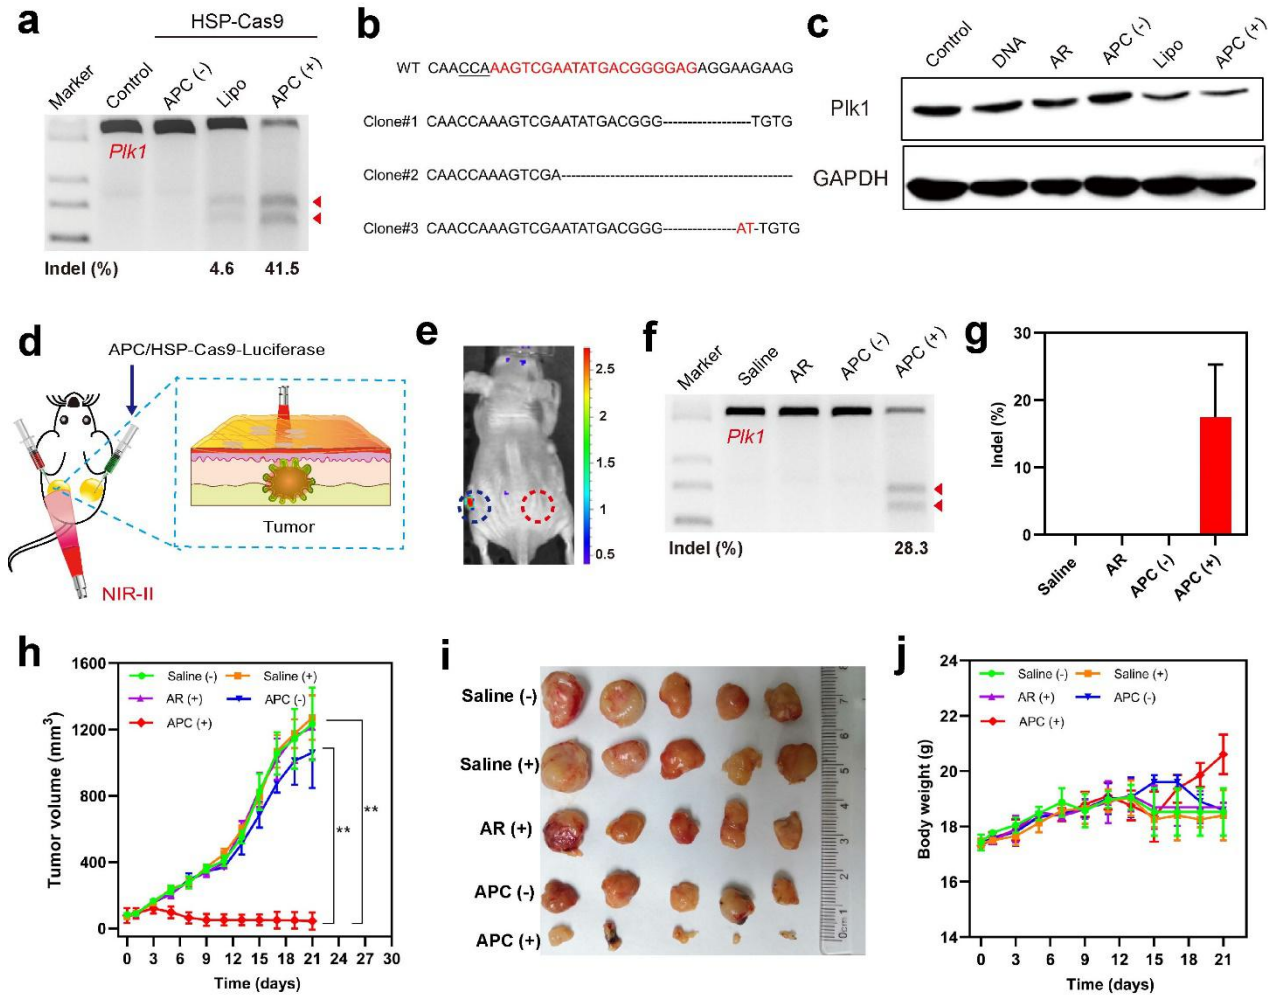

986

987 **Fig. 5 APC-mediated optogenetic activation for therapeutic genome editing *in vitro* and in**  
 988 ***vivo*.** (a-c). In vitro analysis of disruption of *Plk1* gene by optogenetic control of CRISPR/Cas9  
 989 genome editing. a. Indel mutations detected by T7E1 assay. b. Sanger sequencing of T-A  
 990 cloning results from A549 cell (*Plk1*) by APC-mediated transfection. The target sequences were  
 991 marked in red. PAM was underlined. Substitutions and deletions were displayed by red base  
 992 sequences and dotted lines, respectively. c. Western blotting analysis of *Plk1* protein expression.  
 993 d. Illustration of optogenetic activation for in vivo cancer therapy. APC/HSP-Cas9 complexes  
 994 were administered through peritumoral injection, followed by the exposure of tumor to the  
 995 irradiation. e. In vivo luciferase expression in the tumor tissue. The left tumor was exposed to  
 996 laser irradiation, and the right one without laser exposure was used as the control. f. Indel  
 997 mutations of *Plk1* in the tumor tissue. g. Quantitative analysis of indel mutations in the tumor  
 998 tissue. h. The tumor growth curve after the transfection of APC/HSP-Cas9 complexes in the  
 999 tumor tissue, followed by the exposure to irradiation. The treatment was carried twice a week,  
 1000 and continued for 3 weeks. i. The images of dissected tumor tissues from tumor-bearing BALB/c  
 1001 mice with different treatments. j. The body weight change during the treatment. Statistical  
 1002 analysis was performed using Students' t-test. All data represent mean  $\pm$  S.D. (n = 5, \*\*p < 0.01).
